# Supplementary material
Source: publisher figshare collection journal article supplement (https://sage.figshare.com/ndownloader/files/33082519)
Supplement: Supplementary file 1 [file 33082519]

## SUPPLEMENTAL MATERIAL

**Supplement 1 Figure I Exposures suggestively associated with lobar hemorrhage ..... 3**

**Supplement 2 Figure II Exposures suggestively associated with non-lobar hemorrhage..... 4**

**Supplement 3 The single SNP analysis, leave-one-out analysis and comparison of results  
using different MR methods for 42 exposures with  $P_{FDR} < 0.05$  for clinical outcomes ..... 5**

|                                                                      |    |
|----------------------------------------------------------------------|----|
| Figure 1. Self-reported hypertension .....                           | 5  |
| Figure 2. Hypertension diagnosed by doctor .....                     | 6  |
| Figure 3. Systolic blood pressure, automated reading .....           | 7  |
| Figure 4. Diastolic blood pressure, automated reading.....           | 8  |
| Figure 5. Essential (primary) hypertension.....                      | 9  |
| Figure 6. Hypertensive diseases.....                                 | 10 |
| Figure 7. Anti-hypertensive medication .....                         | 11 |
| Figure 8. Hypertension of siblings.....                              | 12 |
| Figure 9. High cholesterol.....                                      | 13 |
| Figure 10. Cholesterol lowering medication.....                      | 14 |
| Figure 11. Cholesterol lowering medication : simvastatin .....       | 15 |
| Figure 12. Body mass index (BMI) .....                               | 16 |
| Figure 13. Leg fat percentage (right) .....                          | 17 |
| Figure 14. Leg fat percentage (left) .....                           | 18 |
| Figure 15. Current tobacco smoking.....                              | 19 |
| Figure 16. None of qualifications .....                              | 20 |
| Figure 17. Time spent watching television .....                      | 21 |
| Figure 18. Variation in diet.....                                    | 22 |
| Figure 19. Overall health rating .....                               | 23 |
| Figure 20. Frequency of tiredness / lethargy in last 2 weeks.....    | 24 |
| Figure 21. Days /week of moderate physical activity >10 minutes..... | 25 |
| Figure 22. Number of treatments/medications taken .....              | 26 |
| Figure 23. Long-standing illness, disability or infirmity .....      | 27 |
| Figure 24. Hypertension of mother .....                              | 28 |
| Figure 25. Self-reported diabetes .....                              | 29 |
| Figure 26. Average monthly intake of other alcoholic drinks .....    | 30 |
| Figure 27. White blood cell count.....                               | 31 |

|                                                                                                                                                                                          |           |
|------------------------------------------------------------------------------------------------------------------------------------------------------------------------------------------|-----------|
| Figure 28. Neutrophil count.....                                                                                                                                                         | 32        |
| Figure 29. Self-reported non-cancer illnesses.....                                                                                                                                       | 33        |
| Figure 30. Never smoked.....                                                                                                                                                             | 34        |
| Figure 31. Usual walking pace.....                                                                                                                                                       | 35        |
| Figure 32. Age first had sexual intercourse .....                                                                                                                                        | 36        |
| Figure 33. A /AS levels qualifications .....                                                                                                                                             | 37        |
| Figure 34. College or university degree.....                                                                                                                                             | 38        |
| Figure 35. Forced vital capacity (FVC) .....                                                                                                                                             | 39        |
| Figure 36. Forced expiratory volume in 1-second (FEV1).....                                                                                                                              | 40        |
| Figure 37. None of vascular/heart problems .....                                                                                                                                         | 41        |
| Figure 38. No medication for cholesterol, hypertension, diabetes, no exogenous hormones...                                                                                               | 42        |
| Figure 39. Standing height.....                                                                                                                                                          | 43        |
| Figure 40. Cheese intake .....                                                                                                                                                           | 44        |
| Figure 41. None of illnesses of siblings.....                                                                                                                                            | 45        |
| Figure 42. Peak expiratory flow (PEF) .....                                                                                                                                              | 46        |
| <b>Supplement 4 The single SNP analysis, leave-one-out analyses and comparison of results using different MR methods for 10 exposures with <math>P_{FDR}&lt;0.05</math> for WMH.....</b> | <b>47</b> |
| Figure 1. Self-reported hypertension .....                                                                                                                                               | 47        |
| Figure 2. Hypertension: diagnosed by doctor .....                                                                                                                                        | 48        |
| Figure 3. Leg fat-free mass (right).....                                                                                                                                                 | 49        |
| Figure 4. Arm fat-free mass (left) .....                                                                                                                                                 | 50        |
| Figure 5. Leg predicted mass (right).....                                                                                                                                                | 51        |
| Figure 6. Leg predicted mass (left) .....                                                                                                                                                | 52        |
| Figure 7. Sitting height .....                                                                                                                                                           | 53        |
| Figure 8. None of vascular/heart problems .....                                                                                                                                          | 54        |
| Figure 9. Impedance of leg (right) .....                                                                                                                                                 | 55        |
| Figure 10. No medication for cholesterol, hypertension or diabetes .....                                                                                                                 | 56        |
| <b>Supplement 5 Table I. IVW analyses, sensitivity, horizontal pleiotropy and heterogeneity analyses for exposures with <math>P_{FDR}&lt;0.05</math> for MD.....</b>                     | <b>57</b> |
| <b>Supplement 6 Reverse causation analysis for significant modifiable exposures .....</b>                                                                                                | <b>58</b> |

## Supplement 1 Figure I. Exposures suggestively associated with lobar hemorrhage

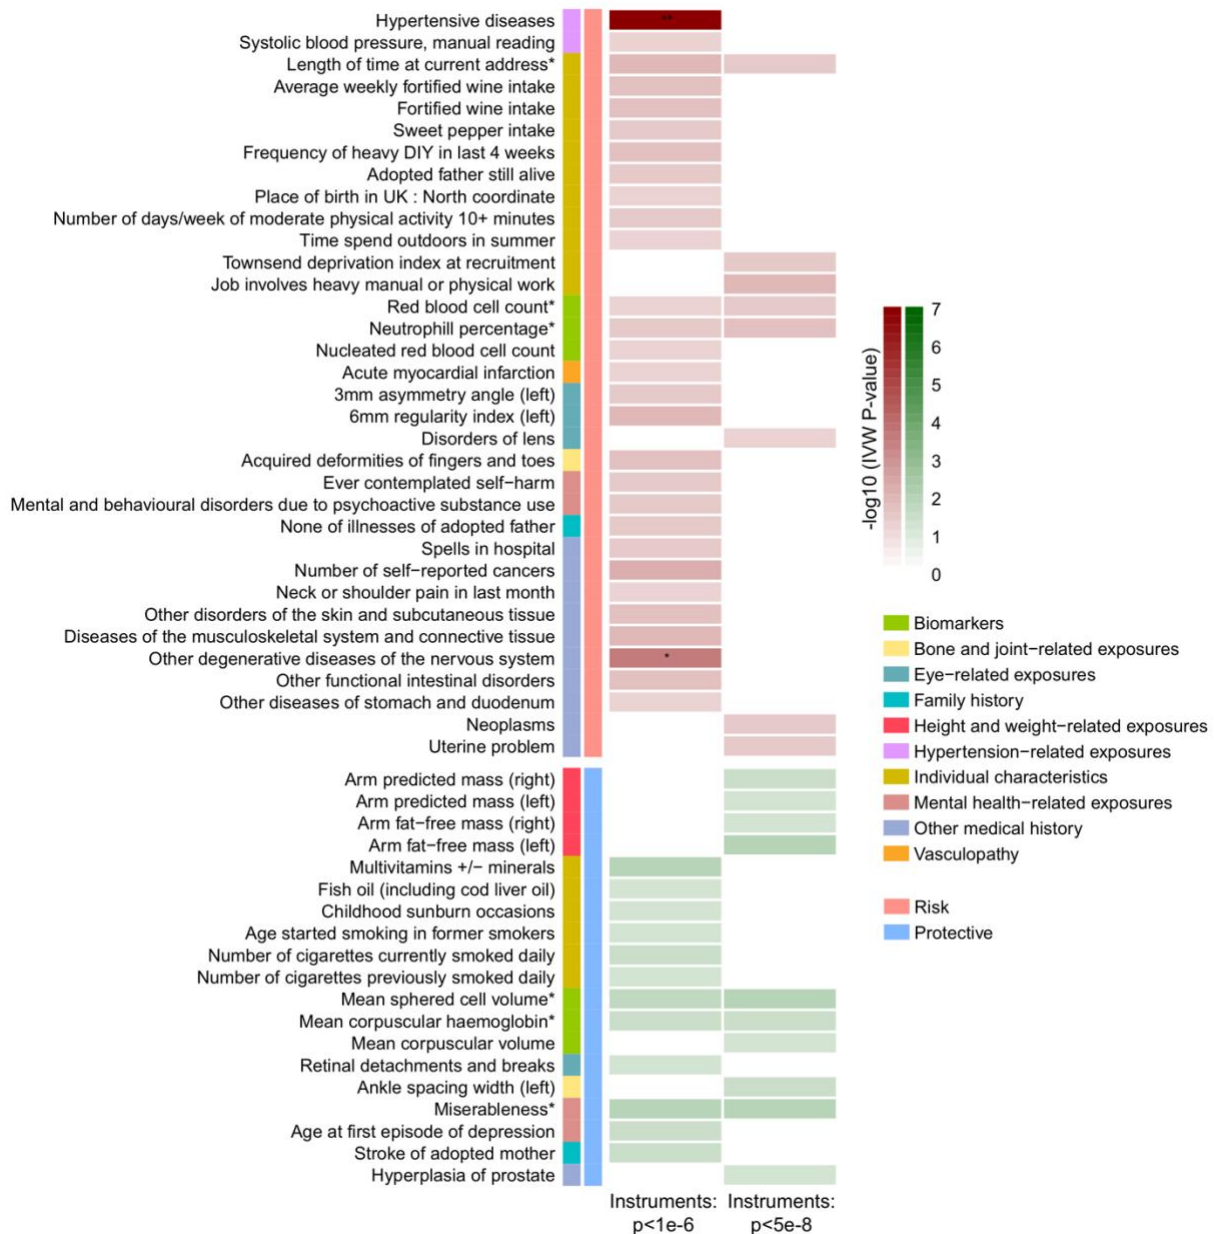

This figure includes exposures with IVW  $P < 0.05$  for “lobar hemorrhage or SVS”, but not for “non-lobar hemorrhage or SVS”. Exposures qualified for this criterion in analysis with instruments of  $p < 1e-6$  (left, 41 exposures) and  $p < 5e-8$  (right, 18 exposures) were all presented. The robustness of suggestive associations between individual exposures and the outcome “lobar hemorrhage or SVS” was roughly reflected by the uncorrected IVW P values. Red indicates risk exposures and green indicates protective exposures, with darker color suggesting stronger association. Significant results after FDR correction were marked.  $*P_{FDR} < 0.05$ ,  $**P_{FDR} < 0.01$ .

Abbreviations: SVS, small vessel stroke; IVW, Inverse Variance Weighted.

## Supplement 2 Figure II. Exposures suggestively associated with non-lobar hemorrhage

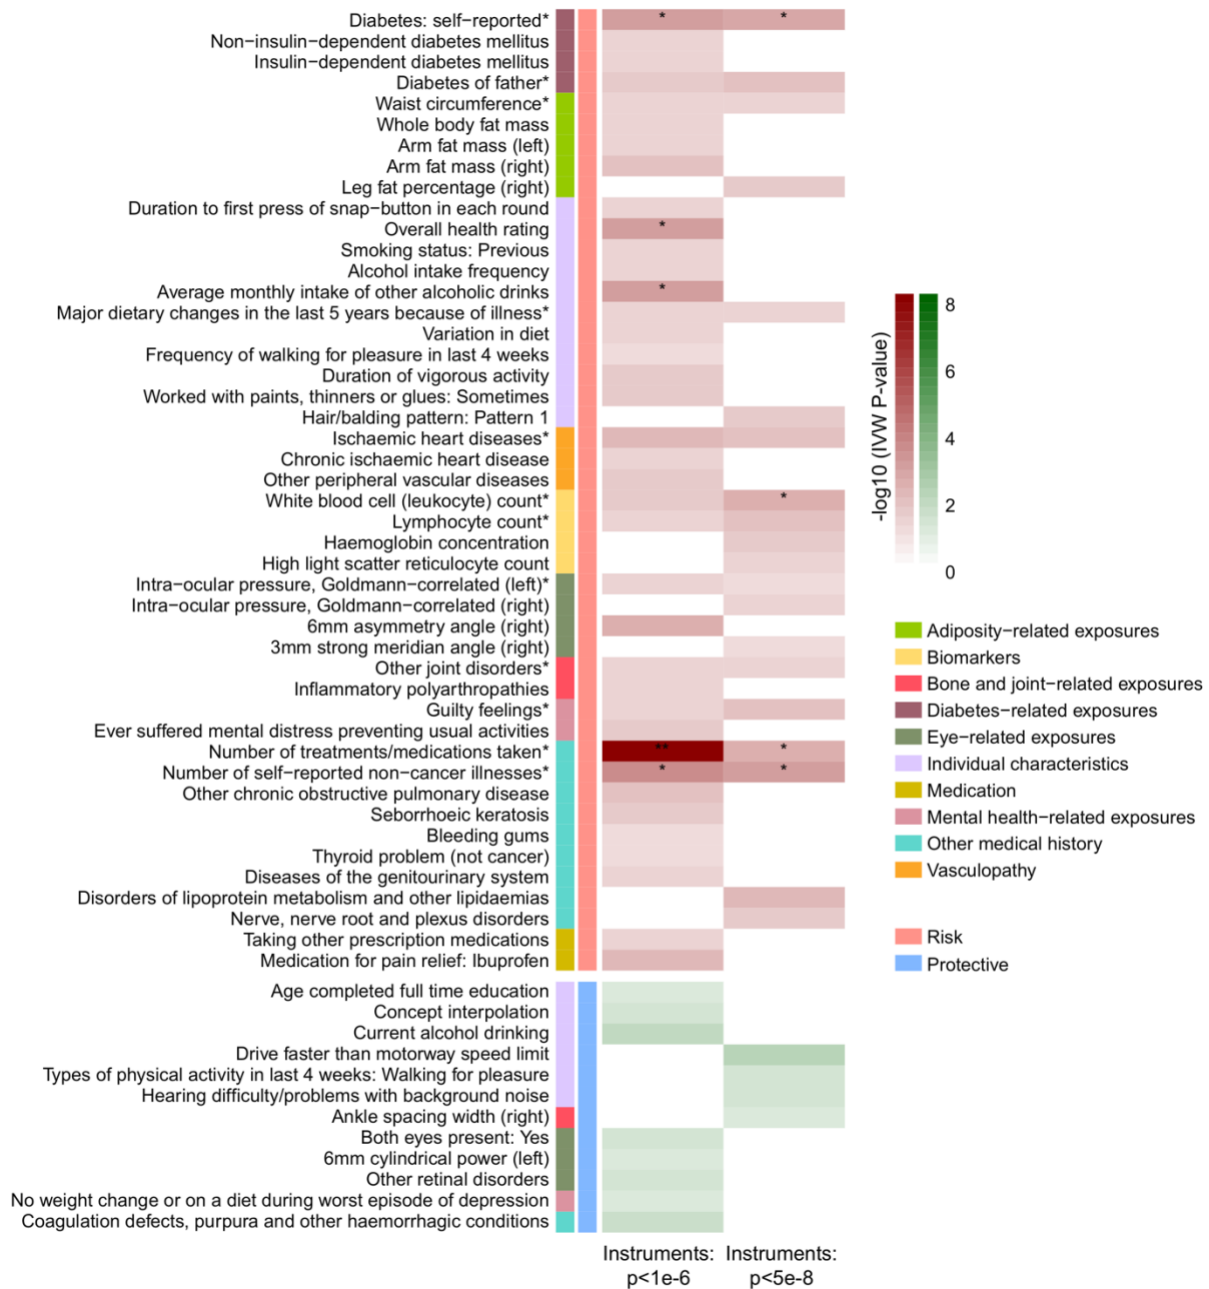

This figure includes exposures with IVW  $P < 0.05$  for “non-lobar hemorrhage or SVS”, but not for “lobar hemorrhage or SVS”. Exposures qualified for this criterion in analysis with instruments of  $p < 1e-6$  (left, 46 exposures) and  $p < 5e-8$  (right, 24 exposures) were all presented. The robustness of suggestive associations between individual exposures and the outcome “non-lobar hemorrhage or SVS” was roughly reflected by the uncorrected IVW P values. Red indicates risk exposures and green indicates protective exposures, with darker color suggesting stronger association. Significant results after FDR correction were marked. \* $P_{FDR} < 0.05$ , \*\* $P_{FDR} < 0.01$ .

Abbreviations: SVS, small vessel stroke; IVW, Inverse Variance Weighted.

### Supplement 3 The single SNP analysis, leave-one-out analysis and comparison of results using different MR methods for 42 exposures with $P_{FDR} < 0.05$ for clinical outcomes

Supplement 3 Figure 1. The single SNP analysis, leave-one-out analysis, comparison of results using different MR methods for self-reported hypertension on ICH or SVS.

(a) Forest plot of single SNP MR

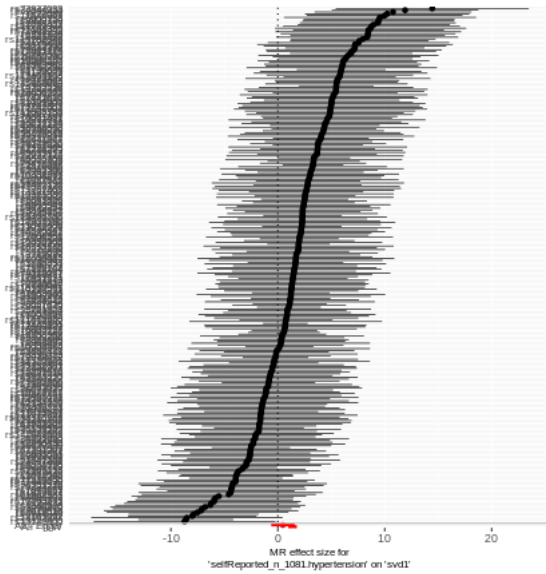

(b) Leave-one-out analysis

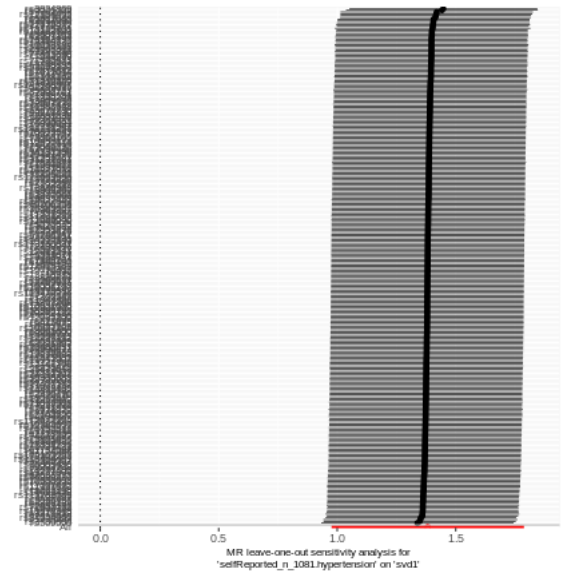

(c) Comparison of results using different MR methods

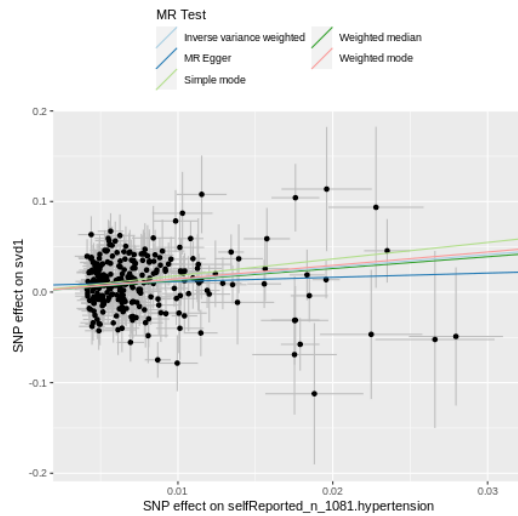

Supplement 3 Figure 2. The single SNP analysis, leave-one-out analysis, comparison of results using different MR methods for hypertension diagnosed by doctor on ICH or SVS.

(a) Forest plot of single SNP MR

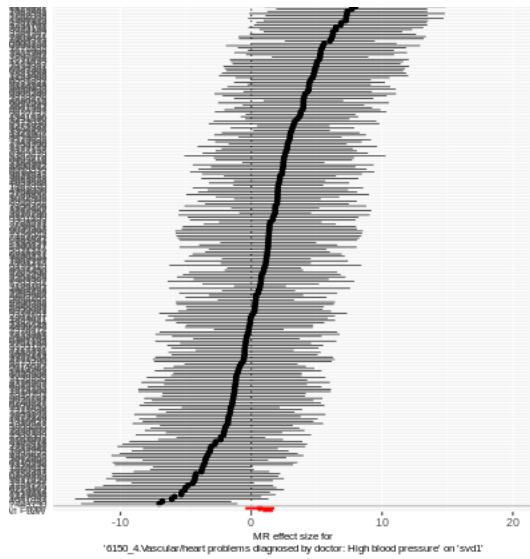

(b) Leave-one-out analysis

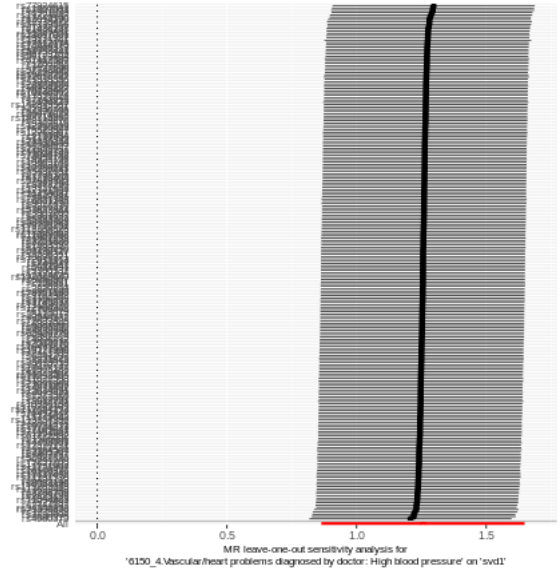

(c) Comparison of results using different MR methods

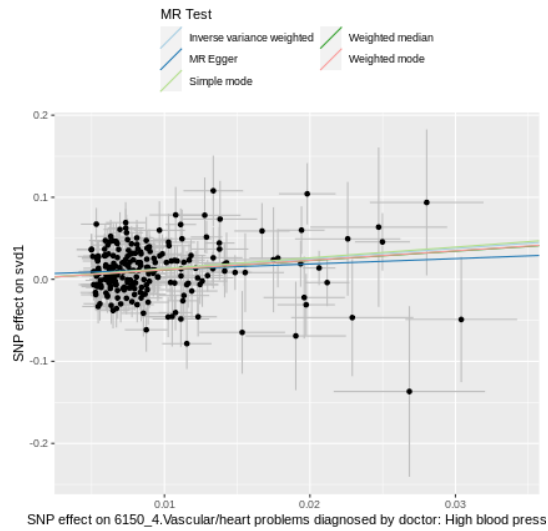

Supplement 3 Figure 3. The single SNP analysis, leave-one-out analysis, comparison of results using different MR methods for systolic blood pressure (automated reading) on ICH or SVS.

(a) Forest plot of single SNP MR

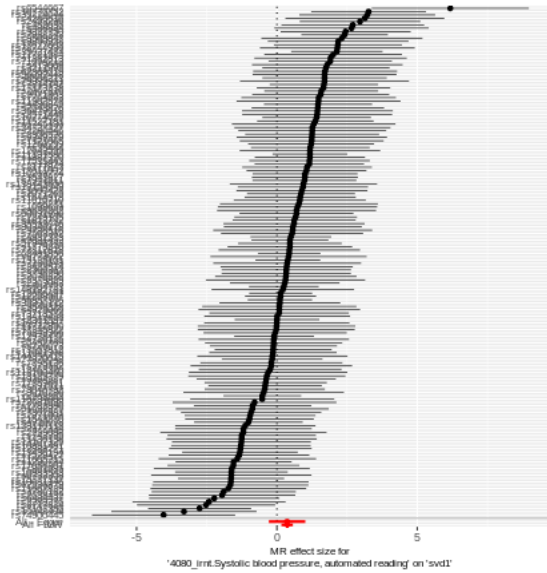

(b) Leave-one-out analysis

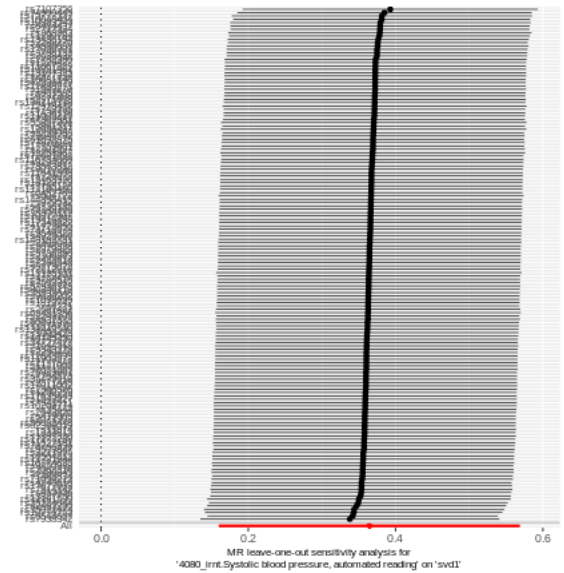

(c) Comparison of results using different MR methods

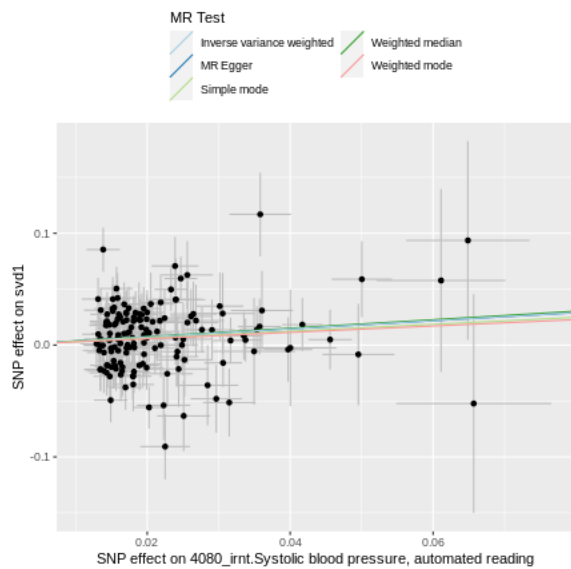

Supplement 3 Figure 4. The single SNP analysis, leave-one-out analysis, comparison of results using different MR methods for diastolic blood pressure (automated reading) on ICH or SVS.

(a) Forest plot of single SNP MR

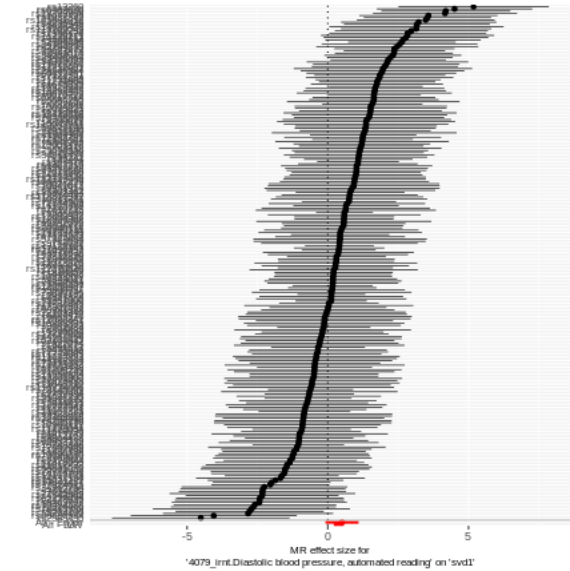

(b) Leave-one-out analysis

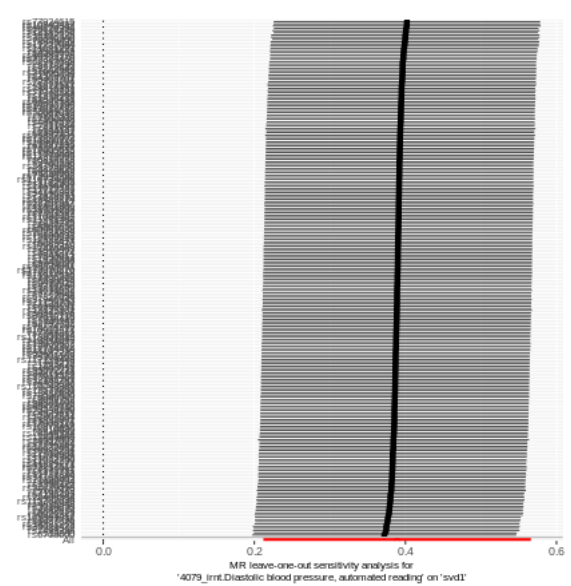

(c) Comparison of results using different MR methods

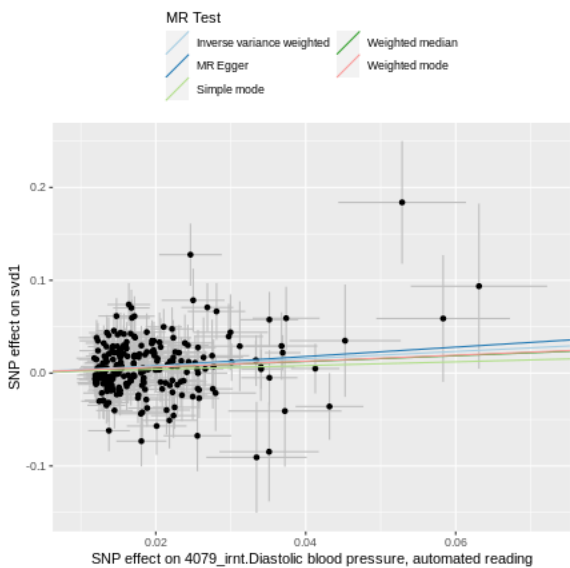



Supplement 3 Figure 5. The single SNP analysis, leave-one-out analysis, comparison of results using different MR methods for essential (primary) hypertension on ICH or SVS

(a) Forest plot of single SNP MR

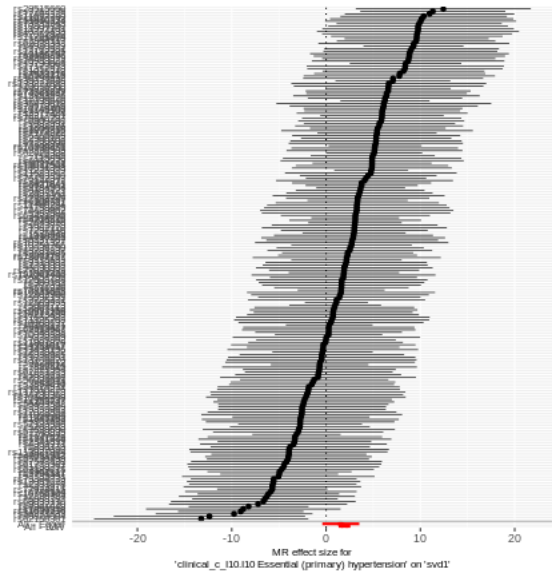

(b) Leave-one-out analysis

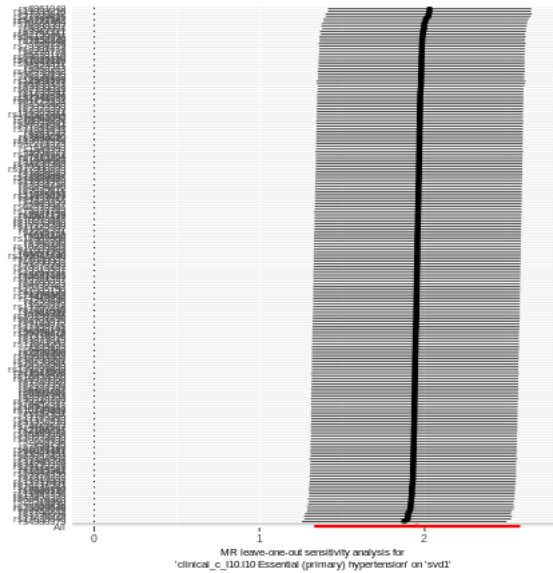

(c) Comparison of results using different MR methods

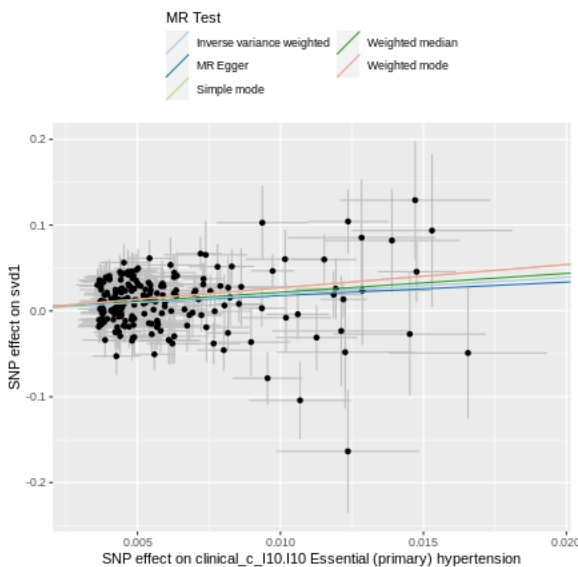

Supplement 3 Figure 6. The single SNP analysis, leave-one-out analysis, comparison of results using different MR methods for hypertensive diseases on ICH or SVS.

(a) Forest plot of single SNP MR

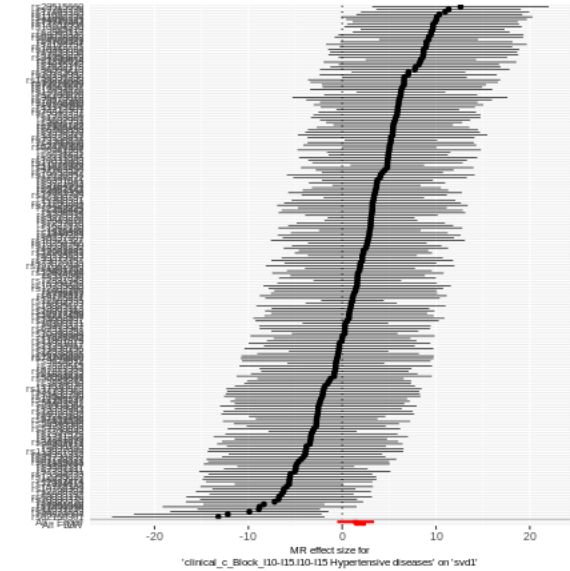

(b) Leave-one-out analysis

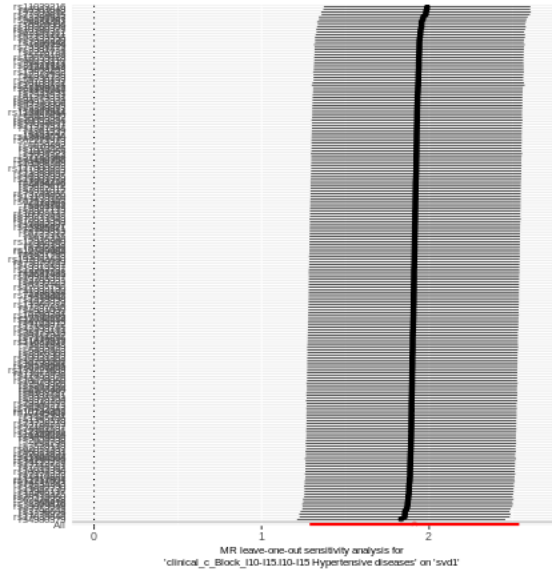

(c) Comparison of results using different MR methods

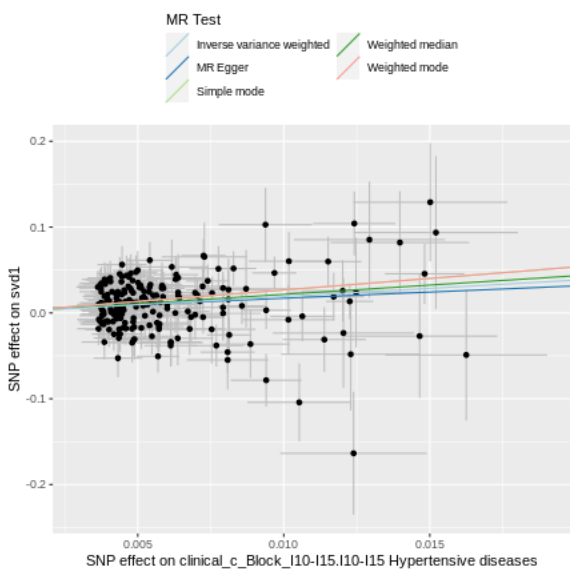

Supplement 3 Figure 7. The single SNP analysis, leave-one-out analysis, comparison of results using different MR methods for anti-hypertensive medication on ICH or SVS.

(a) Forest plot of single SNP MR

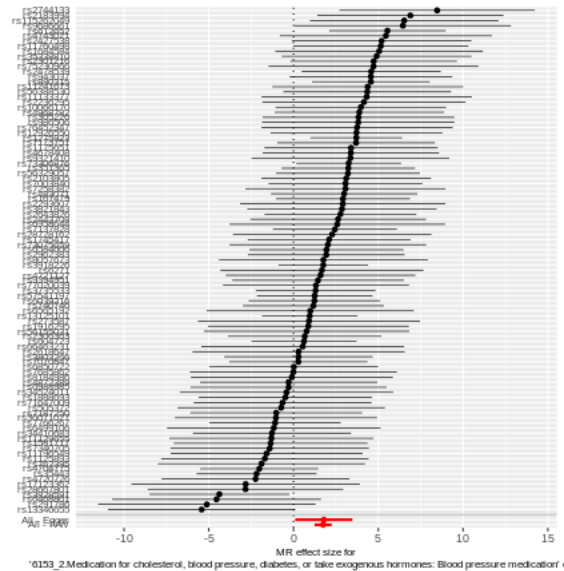

(b) Leave-one-out analysis

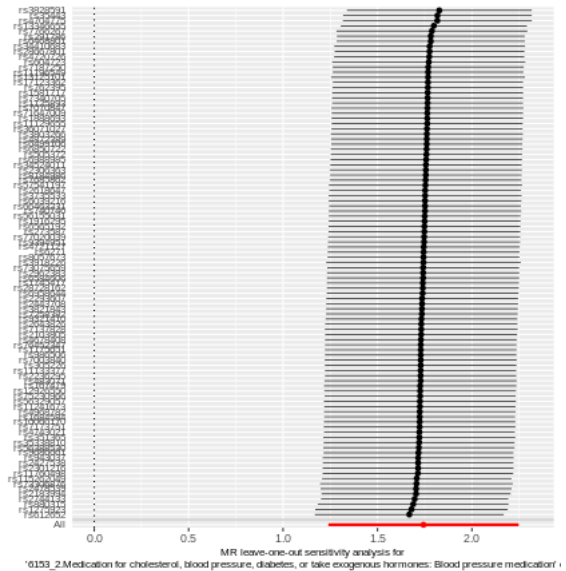

(c) Comparison of results using different MR methods

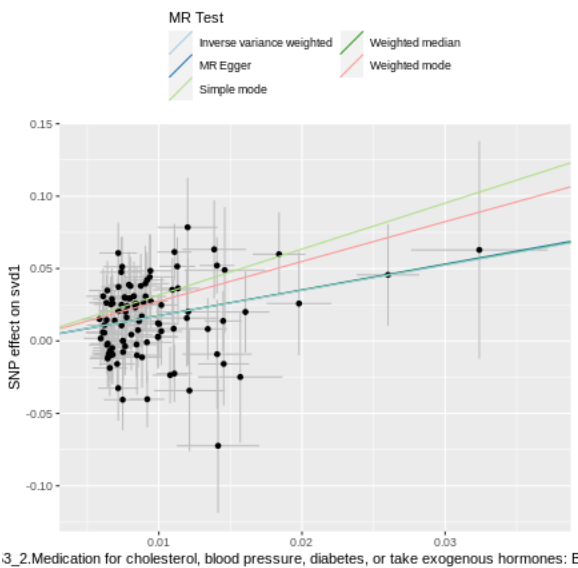

Supplement 3 Figure 8. The single SNP analysis, leave-one-out analysis, comparison of results using different MR methods for hypertension of siblings on ICH or SVS.

(a) Forest plot of single SNP MR

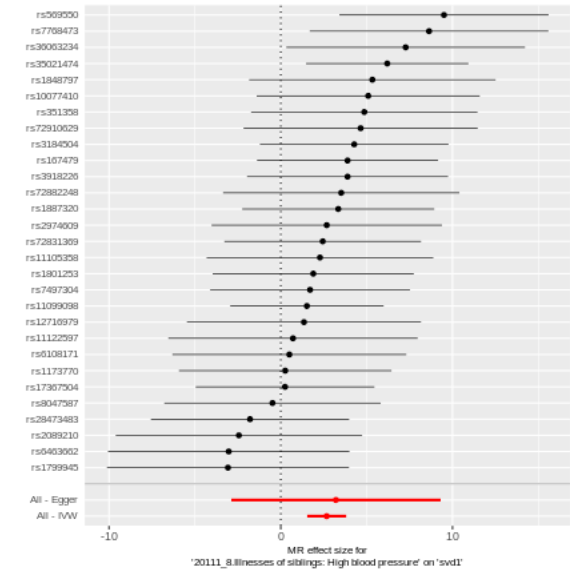

(b) Leave-one-out analysis

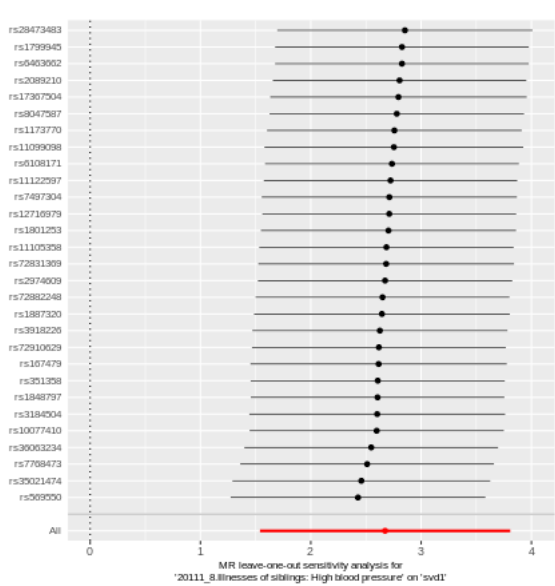

(c) Comparison of results using different MR methods

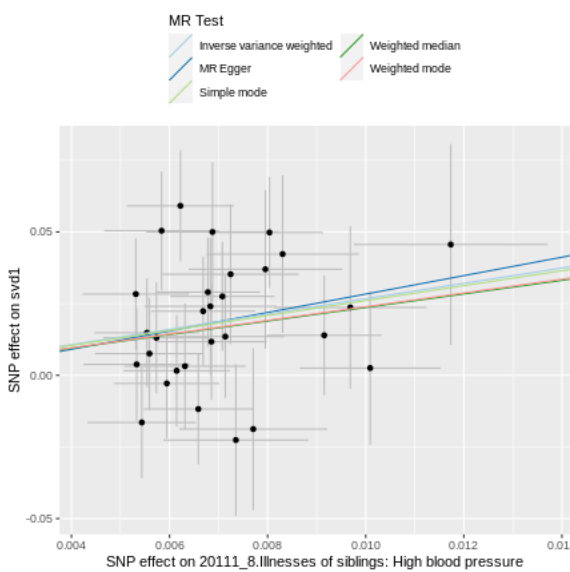

Supplement 3 Figure 9. The single SNP analysis, leave-one-out analysis, comparison of results using different MR methods for high cholesterol on ICH or SVS.

(a) Forest plot of single SNP MR

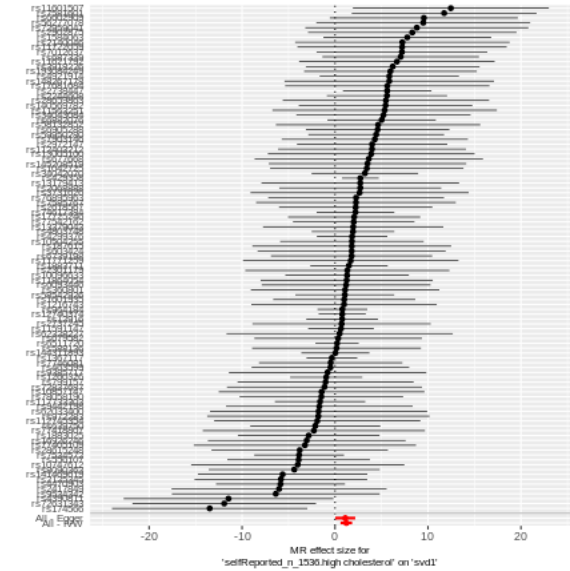

(b) Leave-one-out analysis

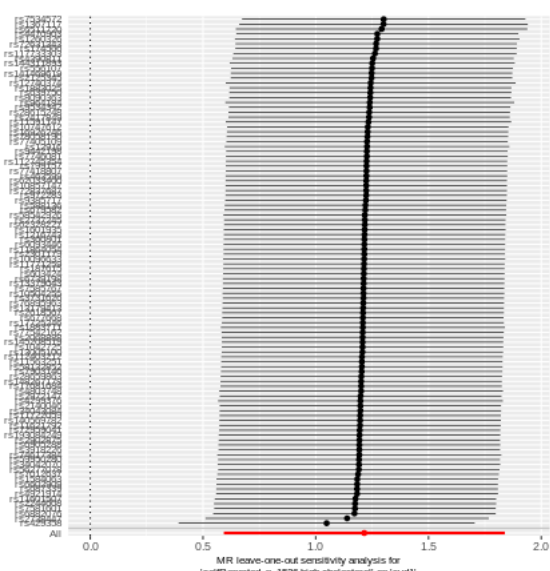

(c) Comparison of results using different MR methods

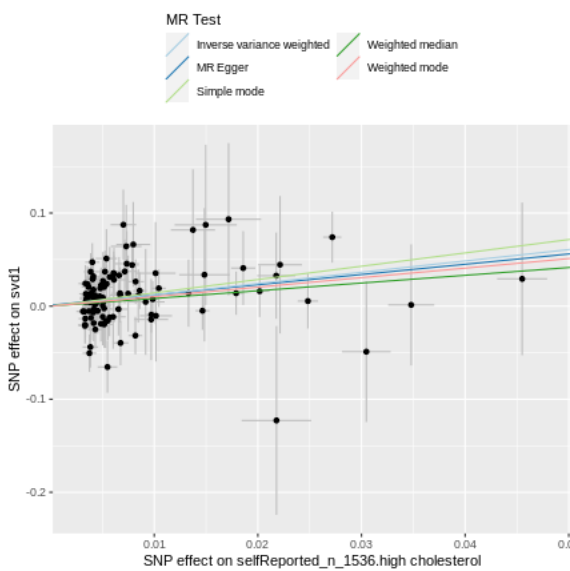

Supplement 3 Figure 10. The single SNP analysis, leave-one-out analysis, comparison of results using different MR methods for cholesterol lowering medication on ICH or SVS.

(a) Forest plot of single SNP MR

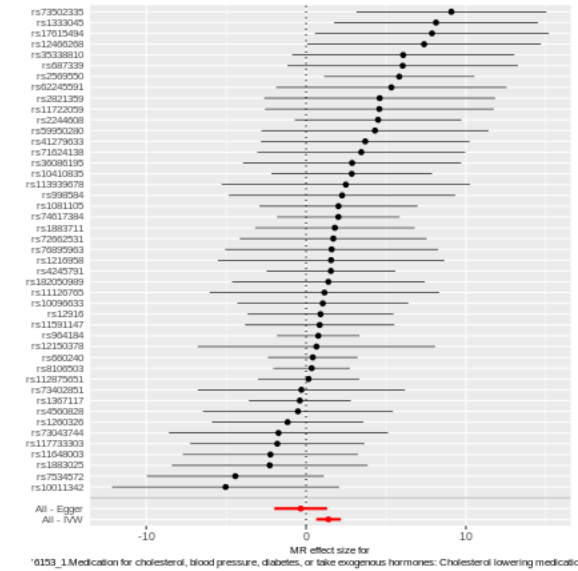

(b) Leave-one-out analysis

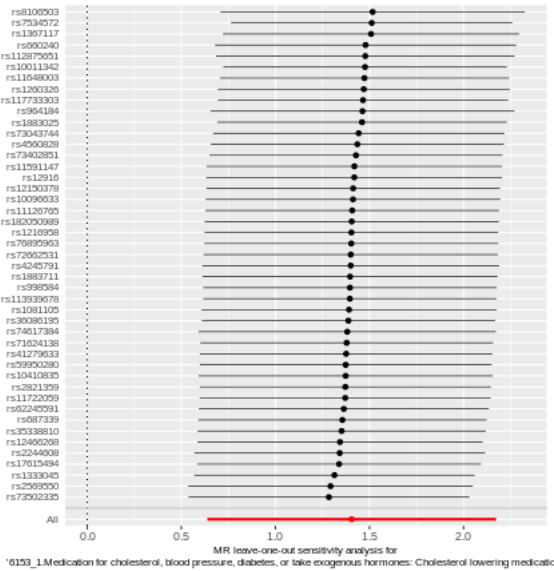

(c) Comparison of results using different MR methods

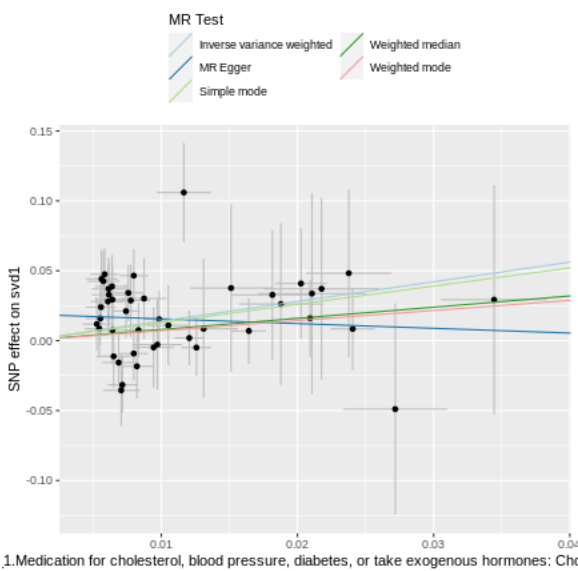

Supplement 3 Figure 11. The single SNP analysis, leave-one-out analysis, comparison of results using different MR methods for cholesterol lowering medication (simvastatin) on ICH or SVS.

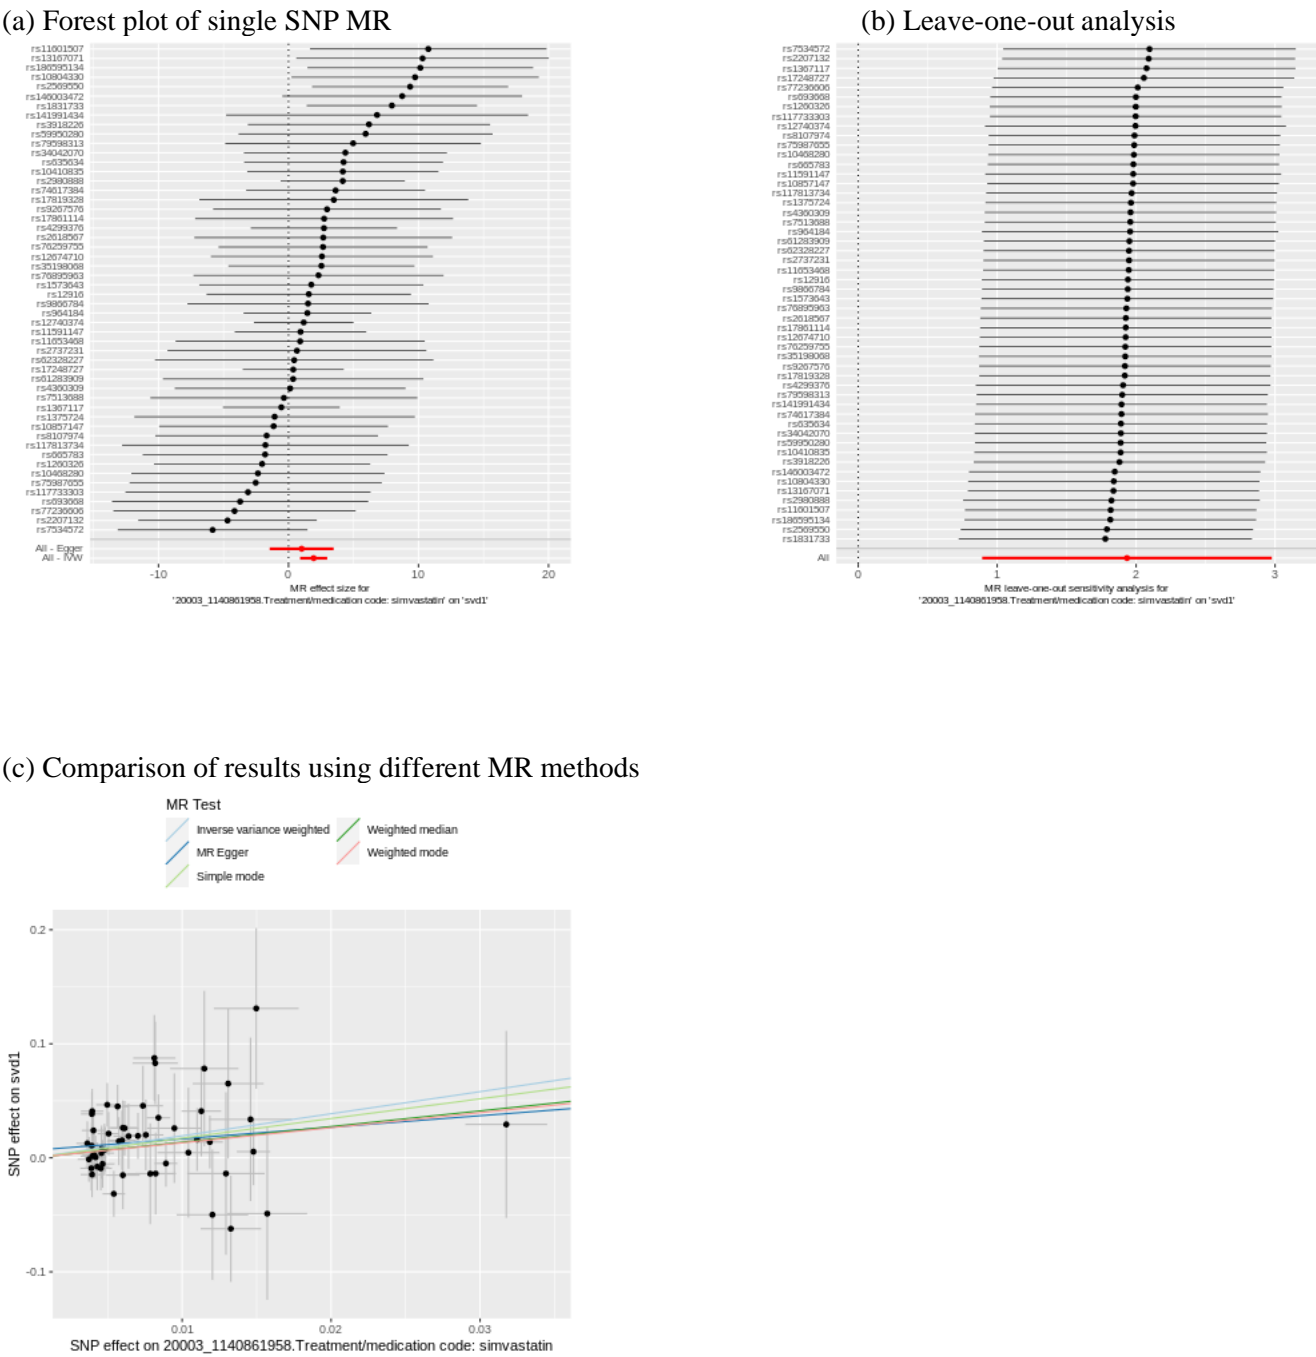

Supplement 3 Figure 12. The single SNP analysis, leave-one-out analysis, comparison of results using different MR methods for body mass index (BMI) on ICH or SVS.

(a) Forest plot of single SNP MR

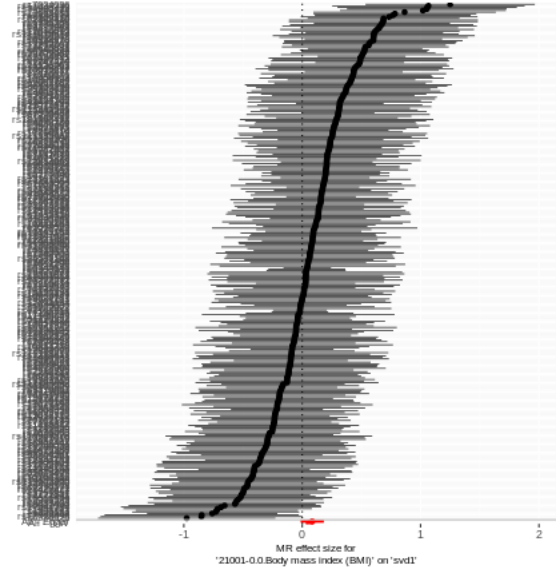

(b) Leave-one-out analysis

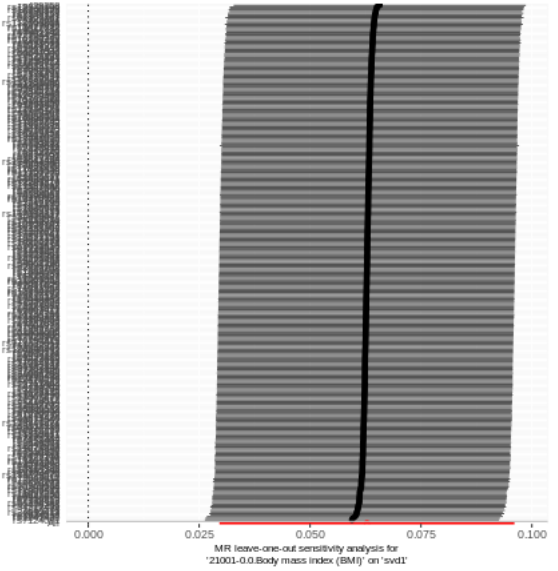

(c) Comparison of results using different MR methods

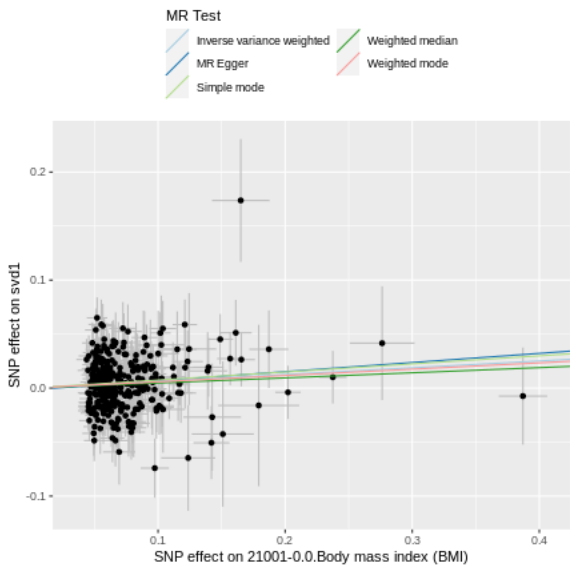



Supplement 3 Figure 13. The single SNP analysis, leave-one-out analysis, comparison of results using different MR methods for leg fat percentage (right) on ICH or SVS.

(a) Forest plot of single SNP MR

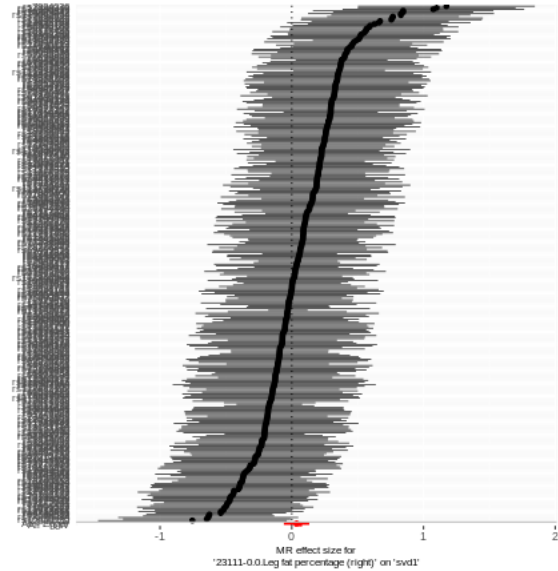

(b) Leave-one-out analysis

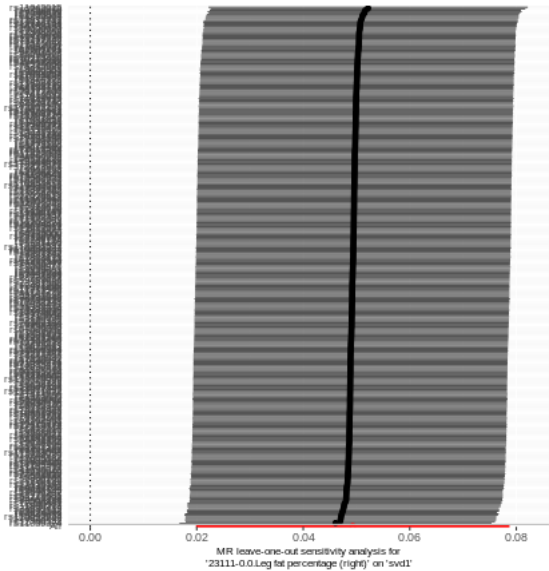

(c) Comparison of results using different MR methods

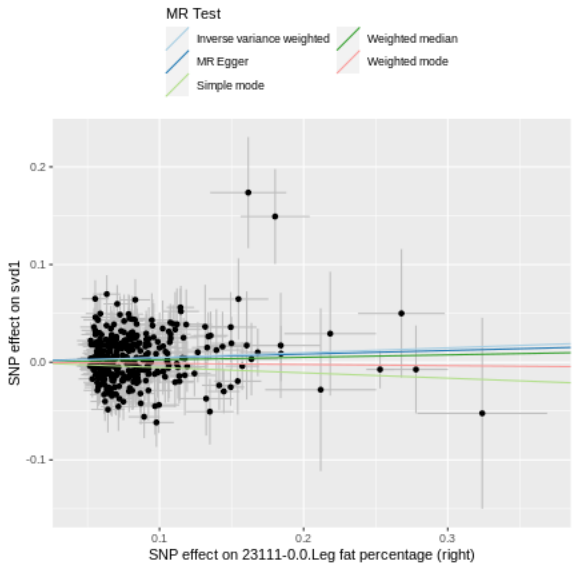

Supplement 3 Figure 14. The single SNP analysis, leave-one-out analysis, comparison of results using different MR methods for leg fat percentage (left) on ICH or SVS.

(a) Forest plot of single SNP MR

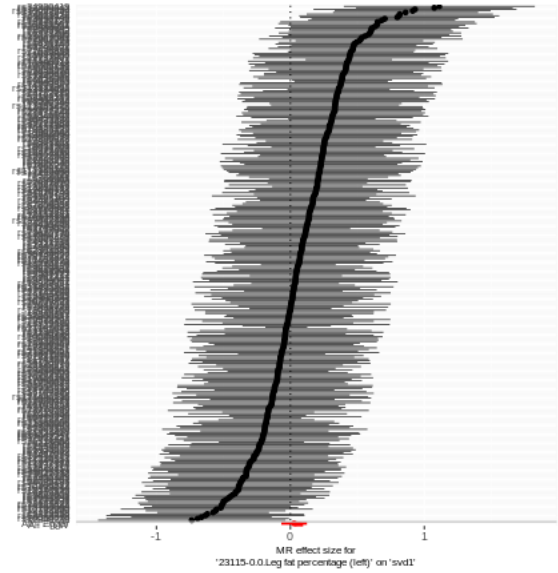

(b) Leave-one-out analysis

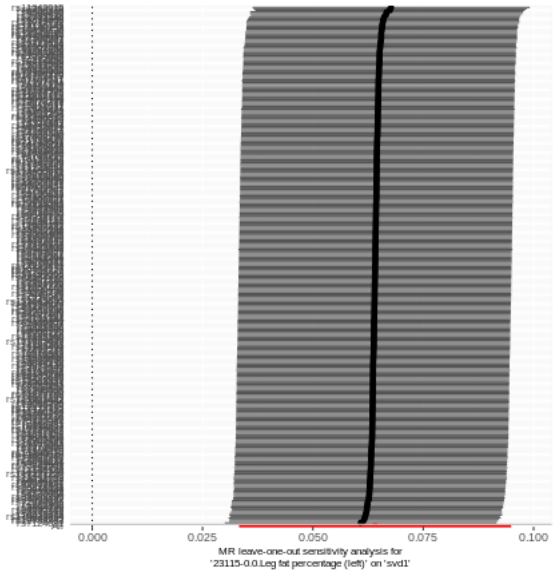

(c) Comparison of results using different MR methods

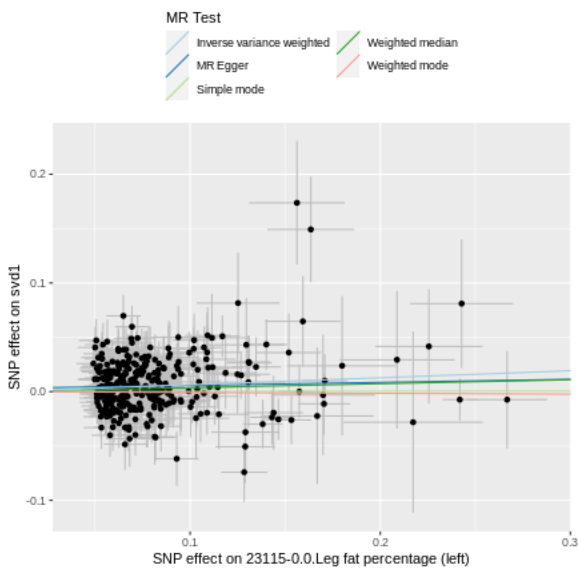

Supplement 3 Figure 15. The single SNP analysis, leave-one-out analysis, comparison of results using different MR methods for current tobacco smoking on ICH or SVS.

(a) Forest plot of single SNP MR

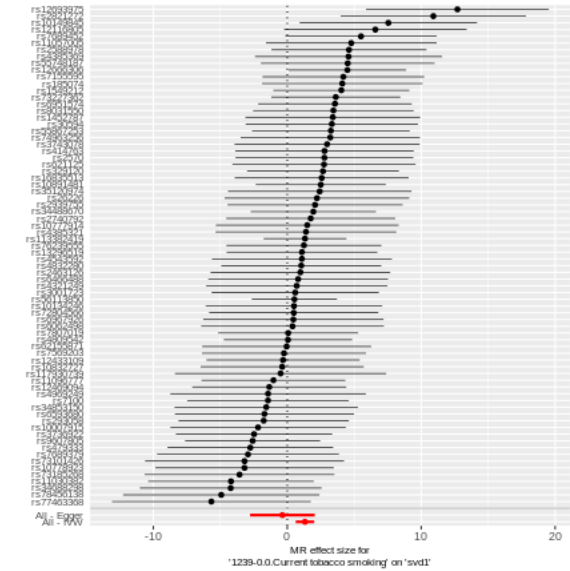

(b) Leave-one-out analysis

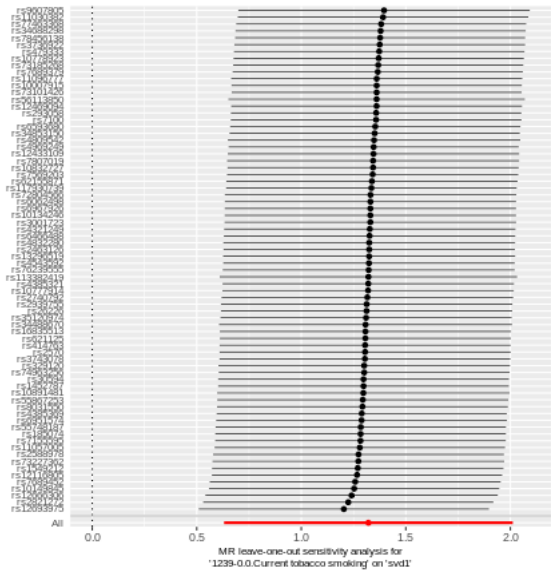

(c) Comparison of results using different MR methods

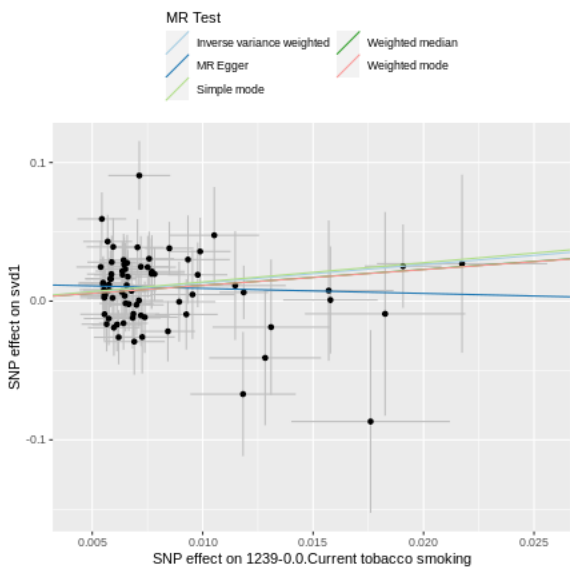

Supplement 3 Figure 16. The single SNP analysis, leave-one-out analysis, comparison of results using different MR methods for none of qualifications on ICH or SVS.

(a) Forest plot of single SNP MR

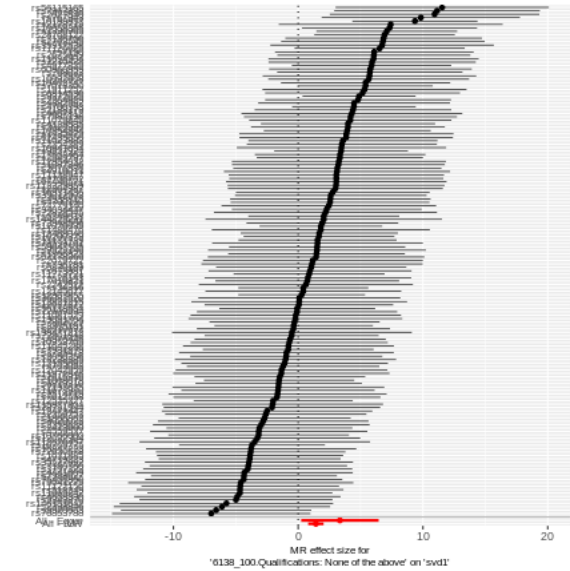

(b) Leave-one-out analysis

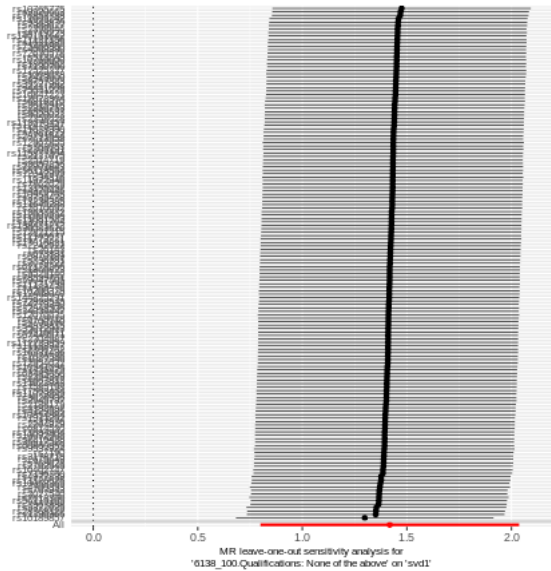

(c) Comparison of results using different MR methods

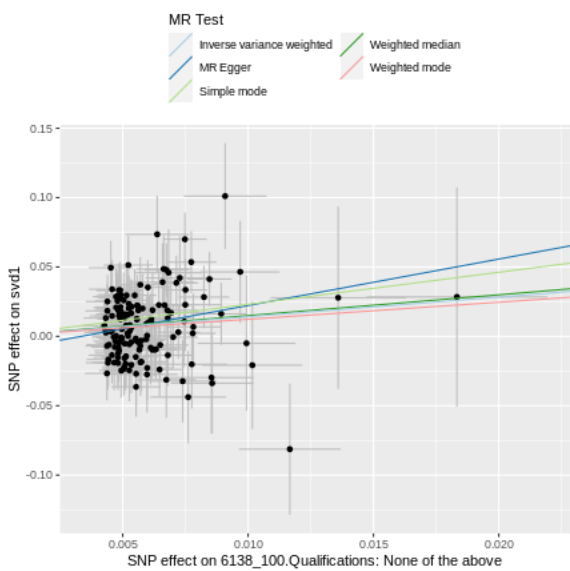

Supplement 3 Figure 17. The single SNP analysis, leave-one-out analysis, comparison of results using different MR methods for time spent watching television on ICH or SVS.

(a) Forest plot of single SNP MR

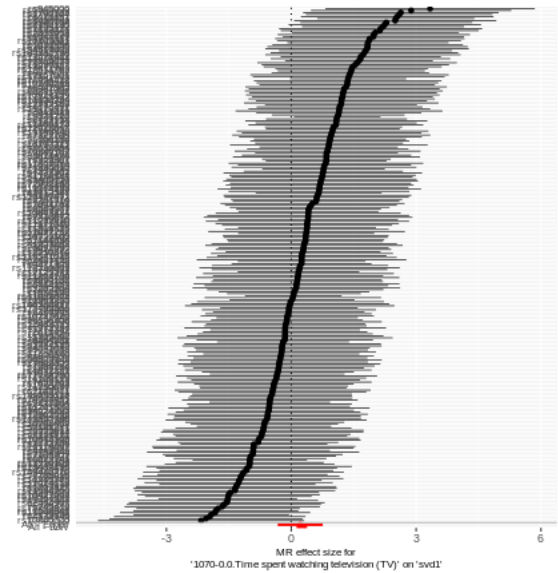

(b) Leave-one-out analysis

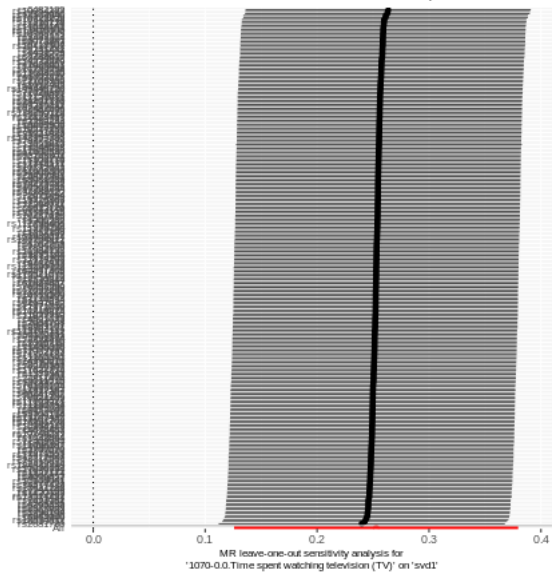

(c) Comparison of results using different MR methods

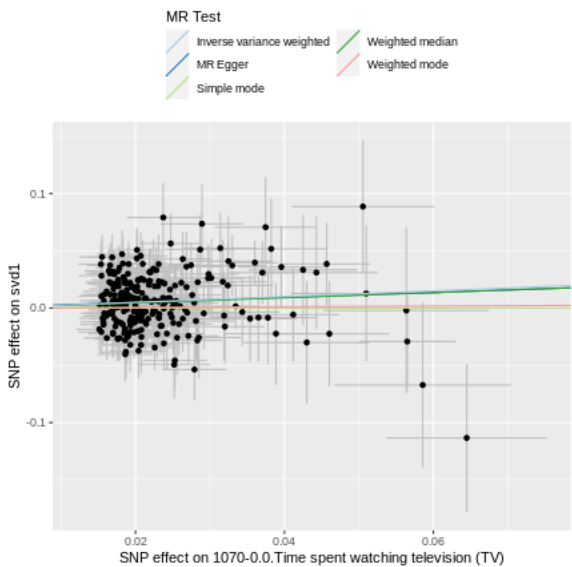

Supplement 3 Figure 18. The single SNP analysis, leave-one-out analysis, comparison of results using different MR methods for variation in diet on ICH or SVS.

(a) Forest plot of single SNP MR

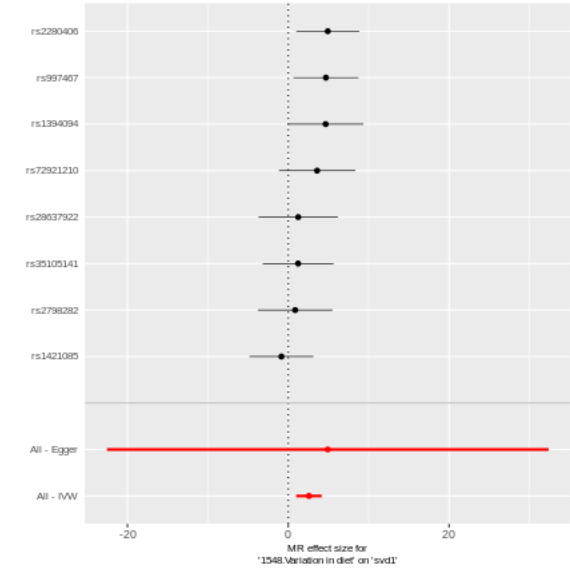

(b) Leave-one-out analysis

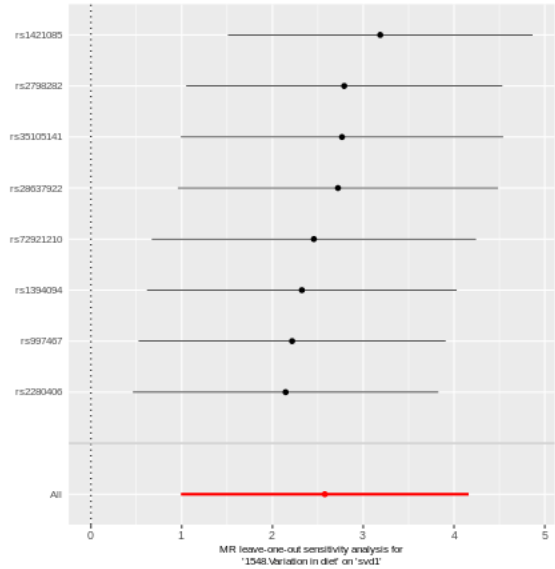

(c) Comparison of results using different MR methods

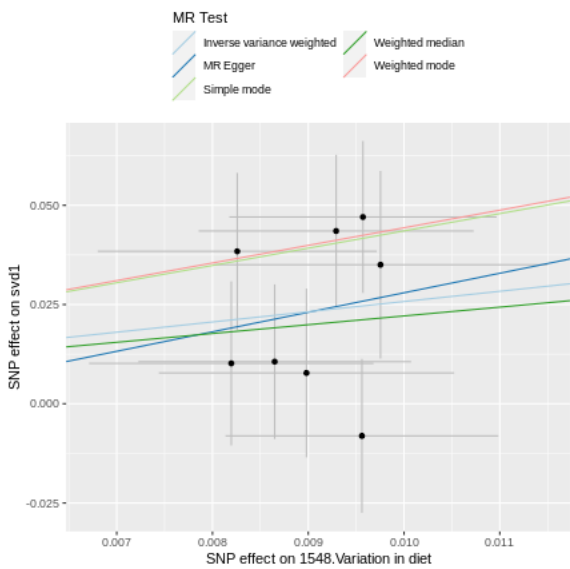

Supplement 3 Figure 19. The single SNP analysis, leave-one-out analysis, comparison of results using different MR methods for overall health rating on ICH or SVS.

(a) Forest plot of single SNP MR

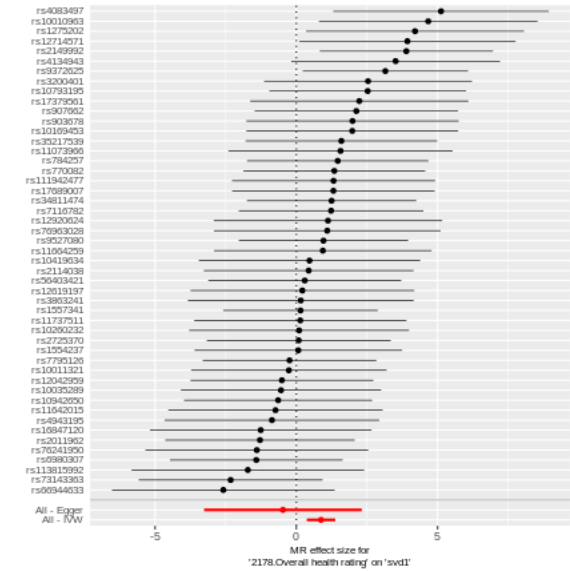

(b) Leave-one-out analysis

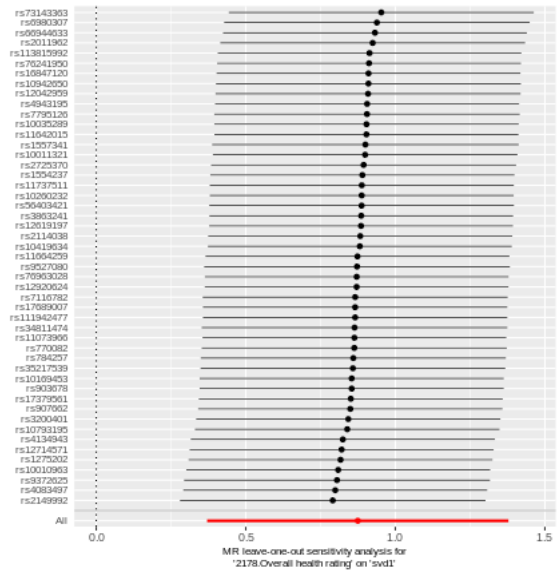

(c) Comparison of results using different MR methods

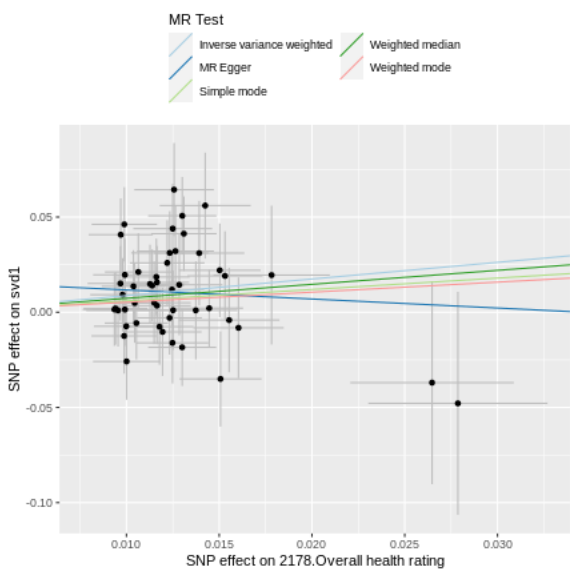

Supplement 3 Figure 20. The single SNP analysis, leave-one-out analysis, comparison of results using different MR methods for frequency of tiredness / lethargy in last 2 weeks on ICH or SVS.

(a) Forest plot of single SNP MR

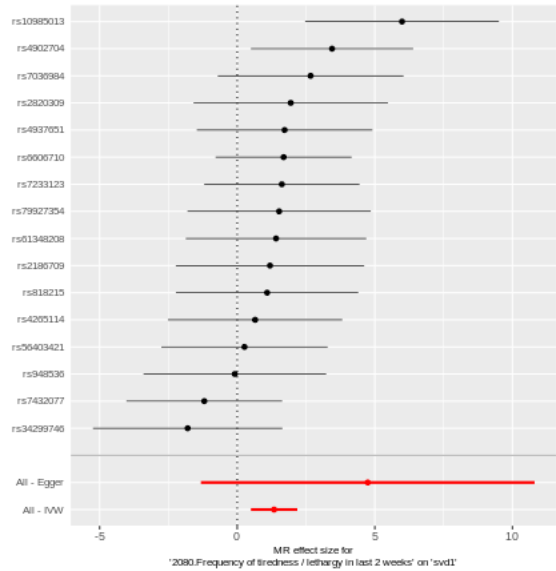

(b) Leave-one-out analysis

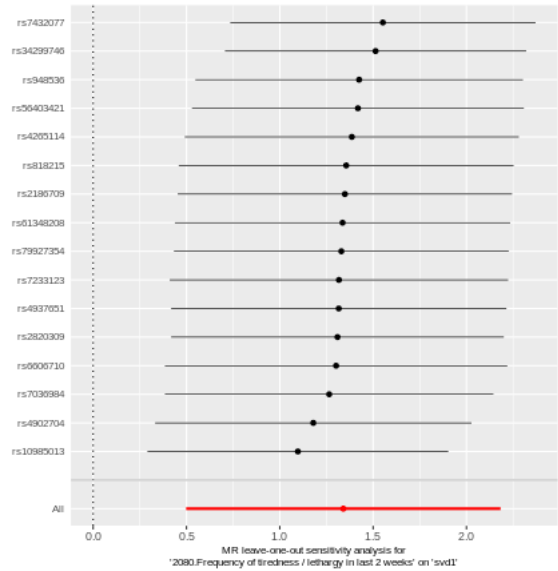

(c) Comparison of results using different MR methods

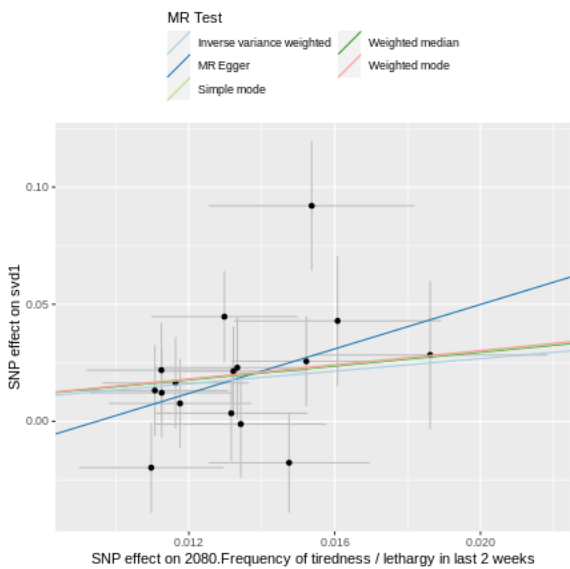



Supplement 3 Figure 21. The single SNP analysis, leave-one-out analysis, comparison of results using different MR methods for days /week of moderate physical activity >10 minutes on ICH or SVS.

(a) Forest plot of single SNP MR

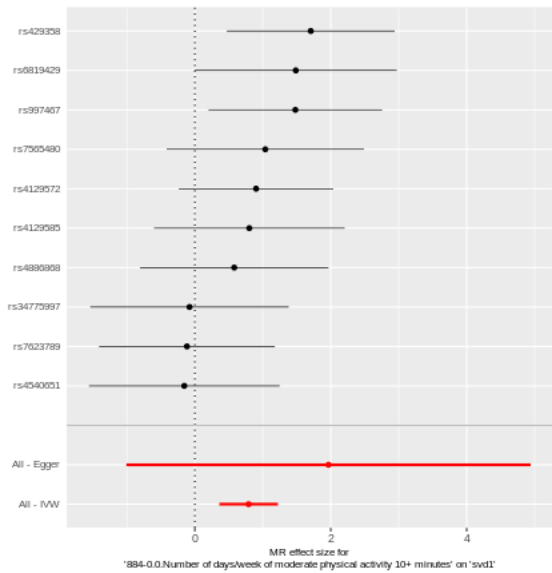

(b) Leave-one-out analysis

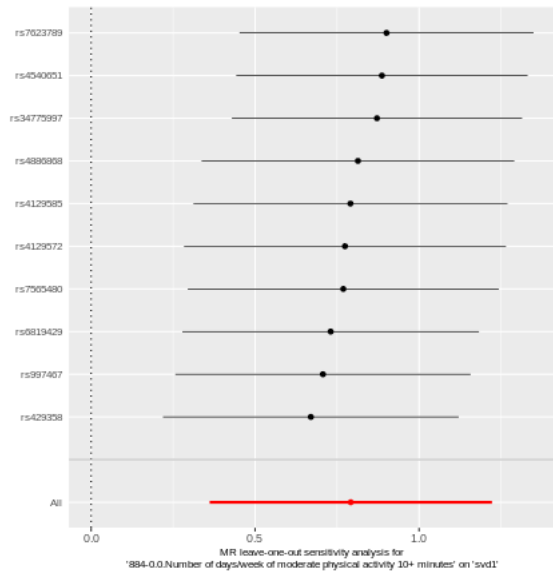

(c) Comparison of results using different MR methods

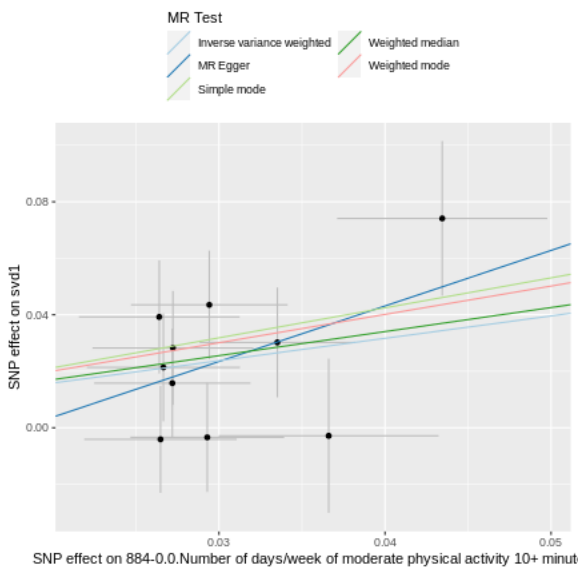

Supplement 3 Figure 22. The single SNP analysis, leave-one-out analysis, comparison of results using different MR methods for number of treatments/medications taken on ICH or SVS.

(a) Forest plot of single SNP MR

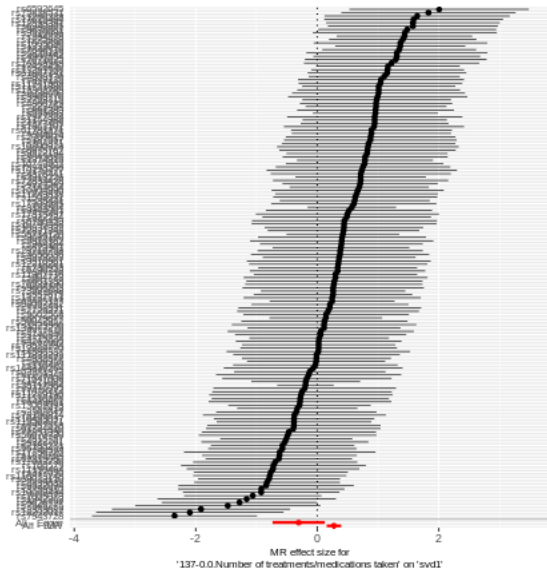

(b) Leave-one-out analysis

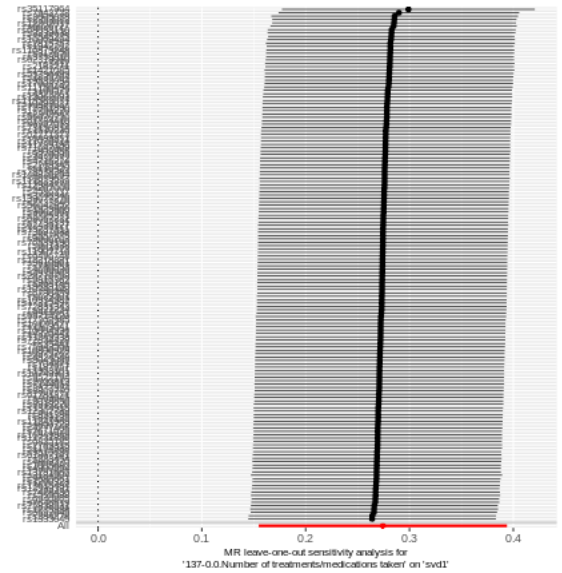

(c) Comparison of results using different MR methods

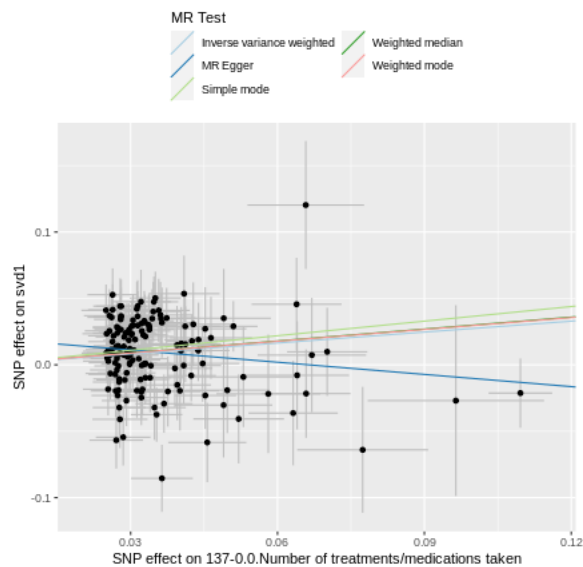

Supplement 3 Figure 23. The single SNP analysis, leave-one-out analysis, comparison of results using different MR methods for long-standing illness, disability or infirmity on lobar hemorrhage or SVS.

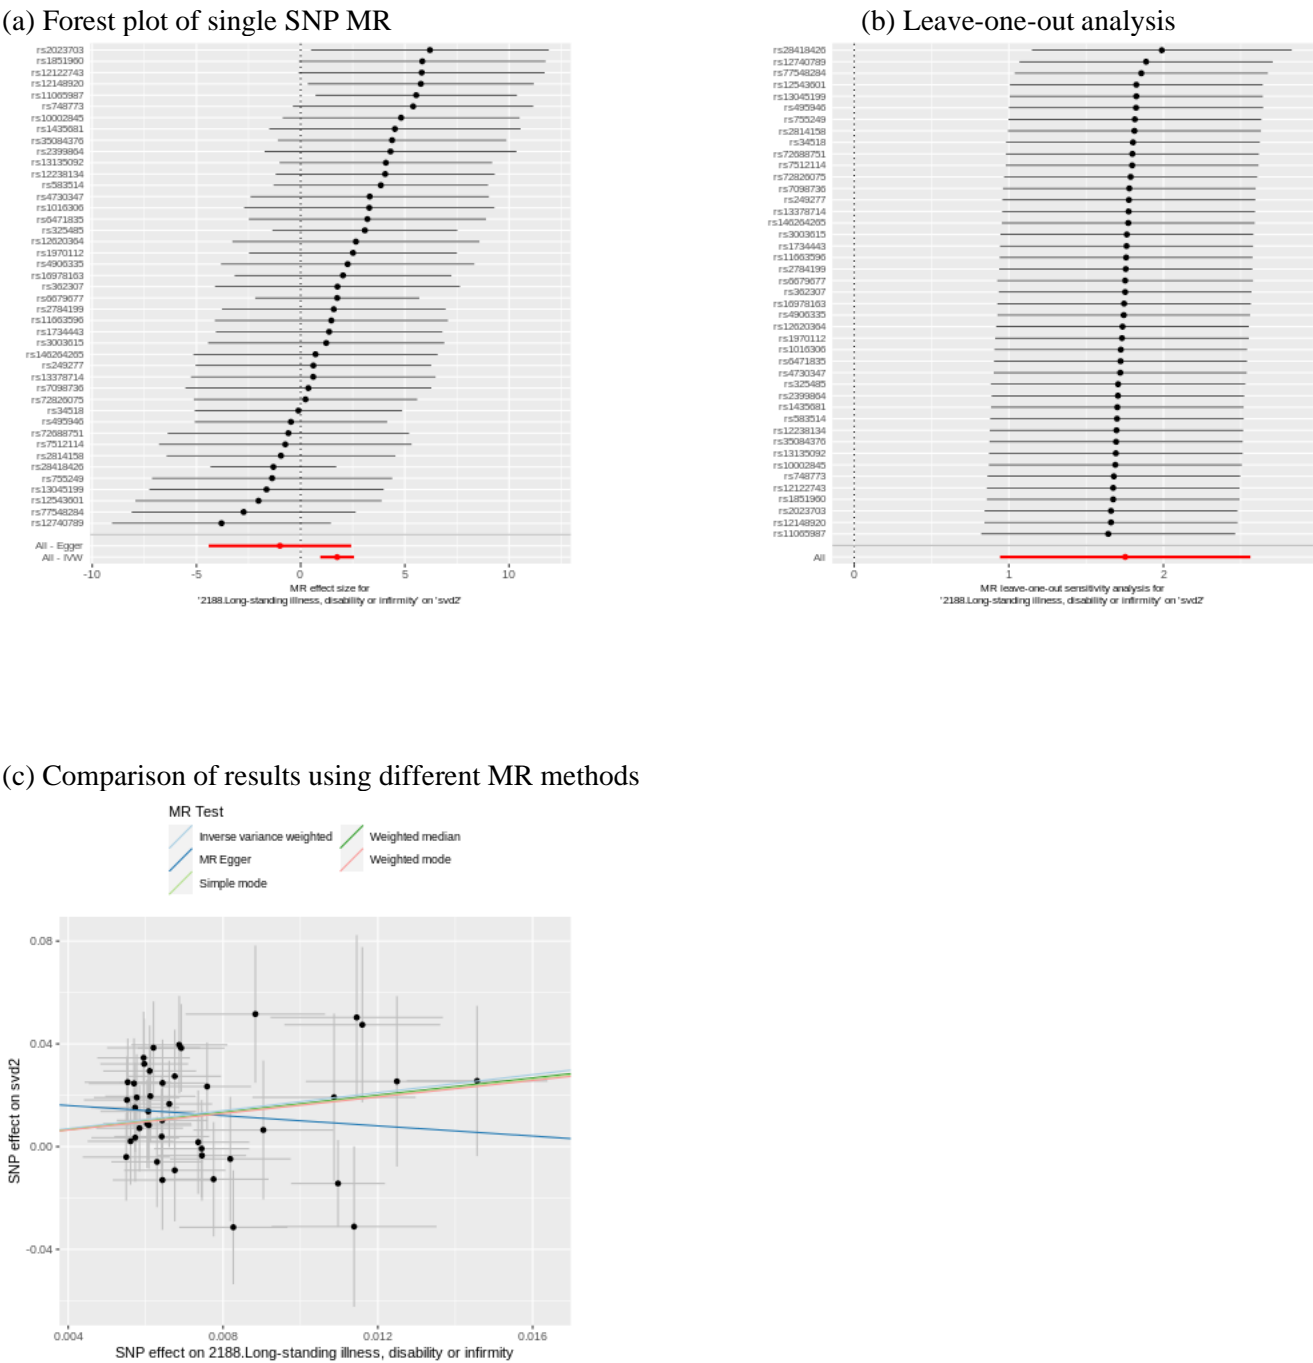

Supplement 3 Figure 24. The single SNP analysis, leave-one-out analysis, comparison of results using different MR methods for hypertension of mother on non-lobar hemorrhage or SVS.

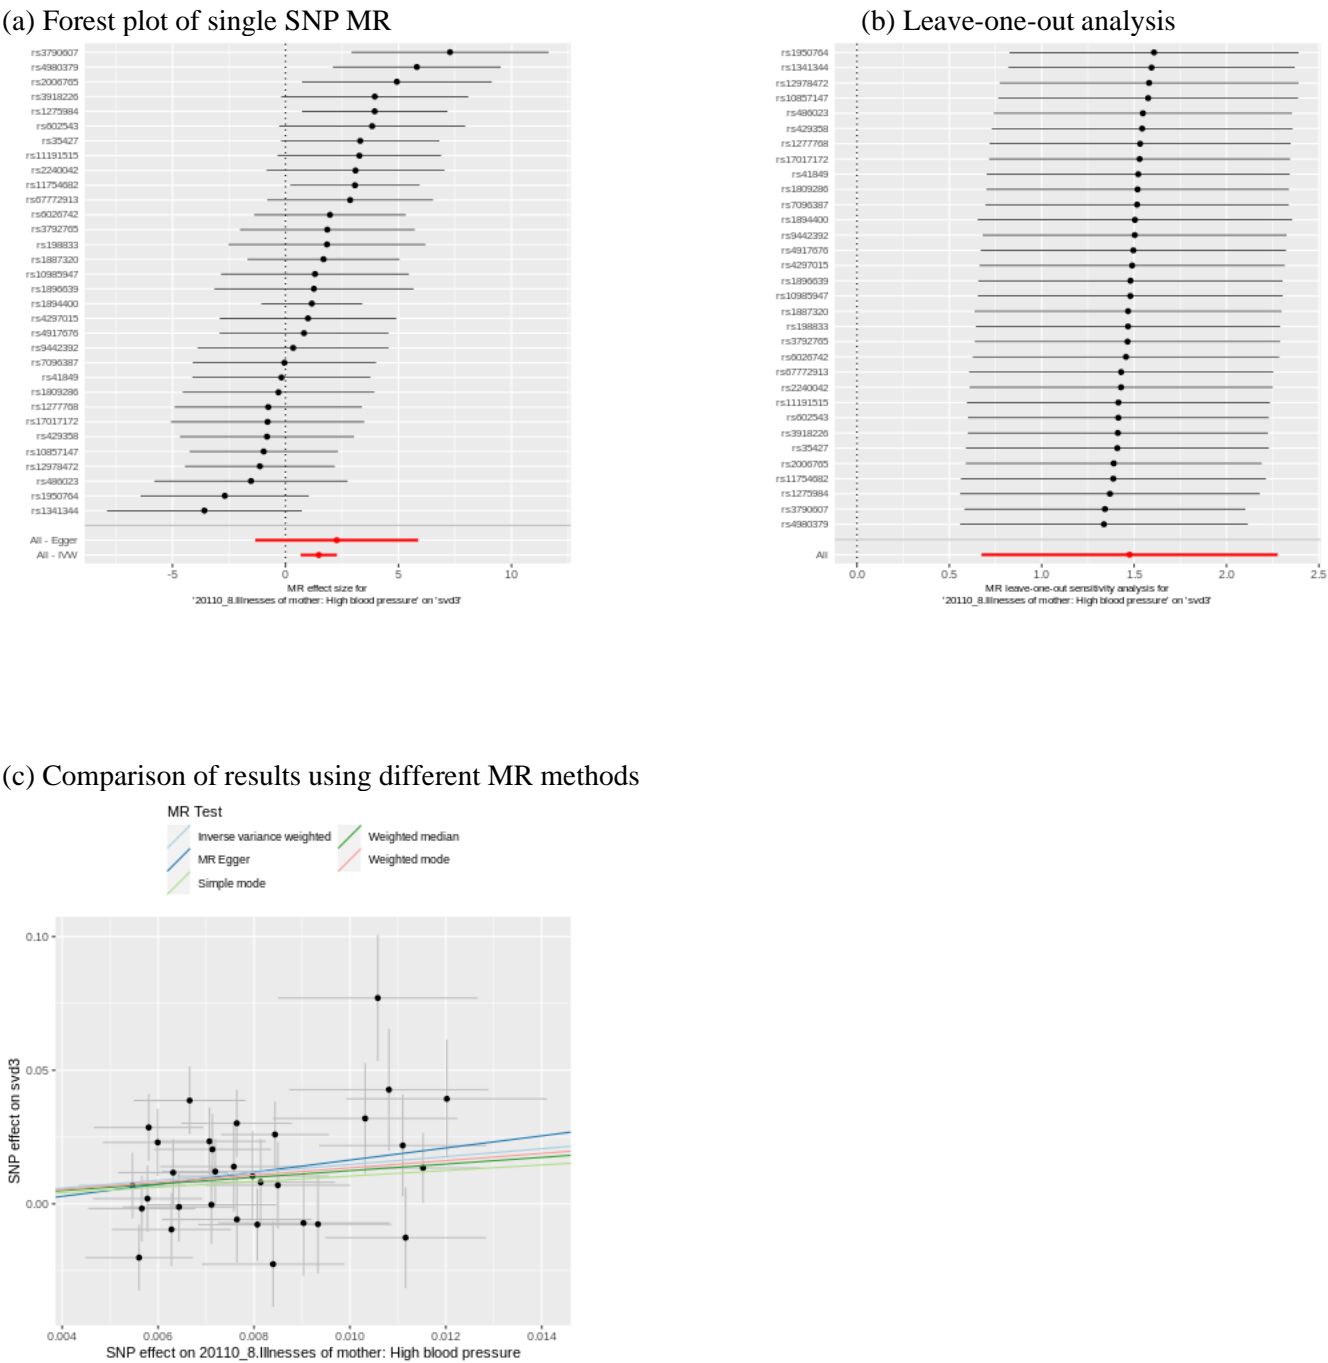

Supplement 3 Figure 25. The single SNP analysis, leave-one-out analysis, comparison of results using different MR methods for self-reported diabetes on non-lobar hemorrhage or SVS.

(a) Forest plot of single SNP MR

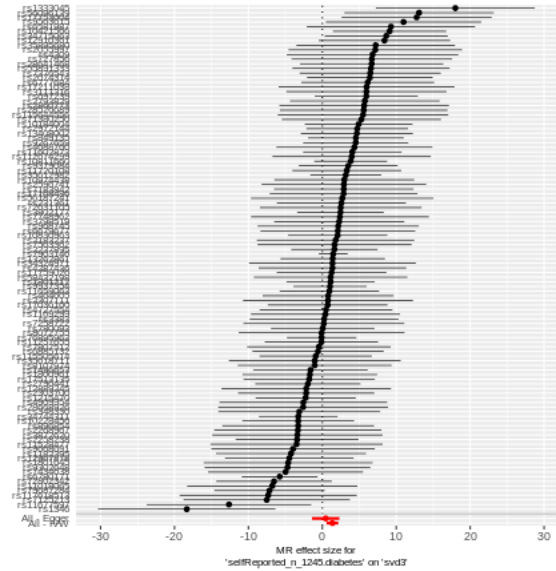

(b) Leave-one-out analysis

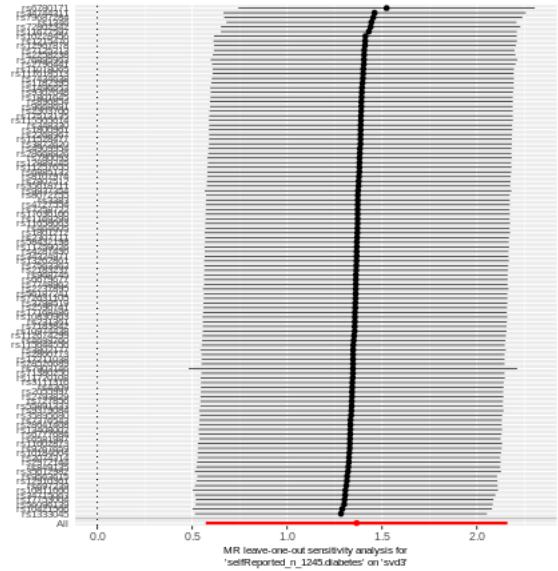

(c) Comparison of results using different MR methods

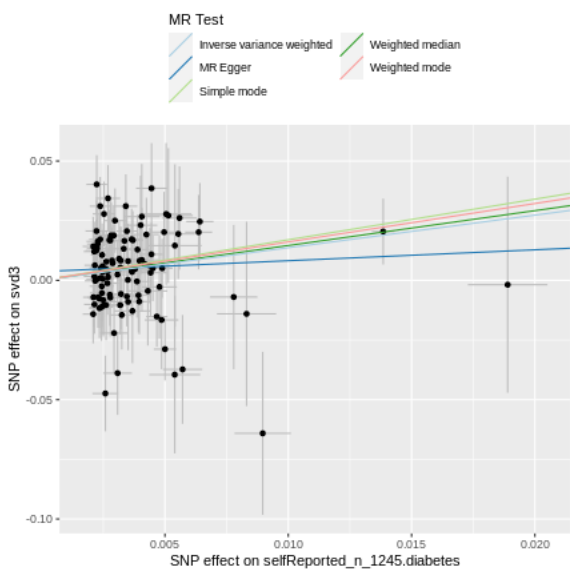

Supplement 3 Figure 26. The single SNP analysis, leave-one-out analysis, comparison of results using different MR methods for average monthly intake of other alcoholic drinks on non-lobar hemorrhage or SVS.

(a) Forest plot of single SNP MR

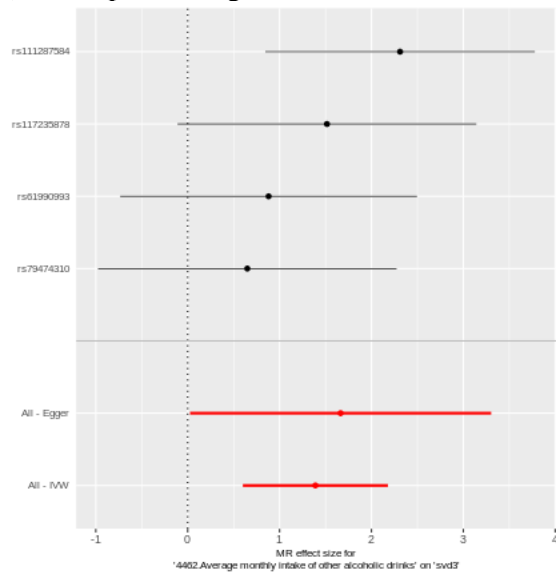

(b) Leave-one-out analysis

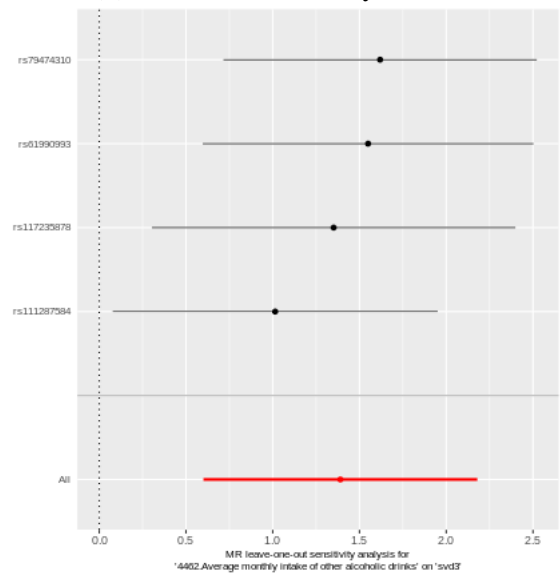

(c) Comparison of results using different MR methods

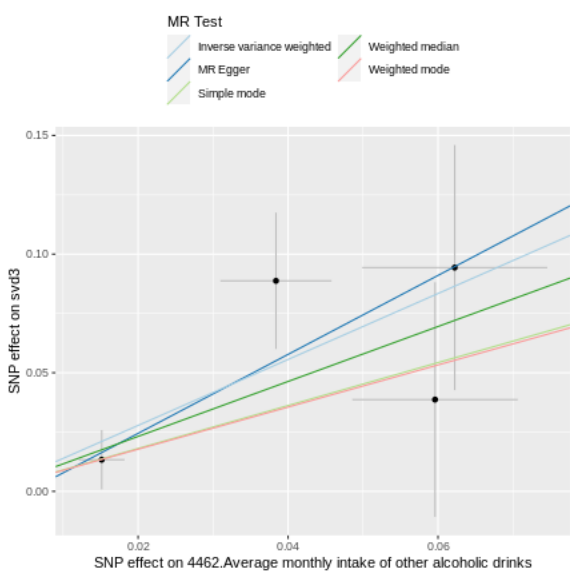

Supplement 3 Figure 27. The single SNP analysis, leave-one-out analysis, comparison of results using different MR methods for white blood cell count on non-lobar hemorrhage or SVS.

(a) Forest plot of single SNP MR

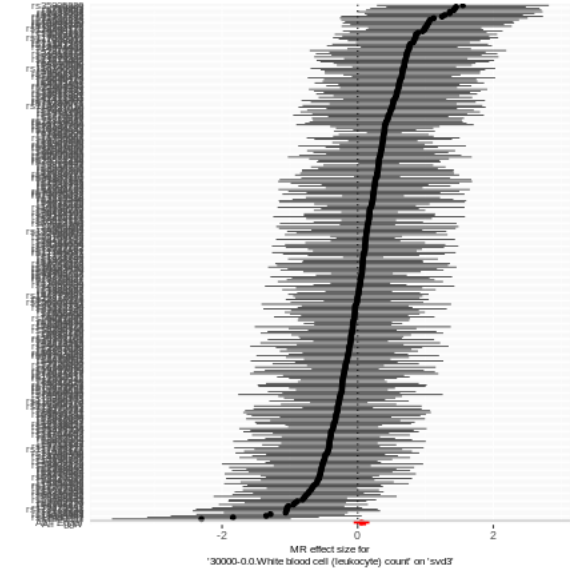

(b) Leave-one-out analysis

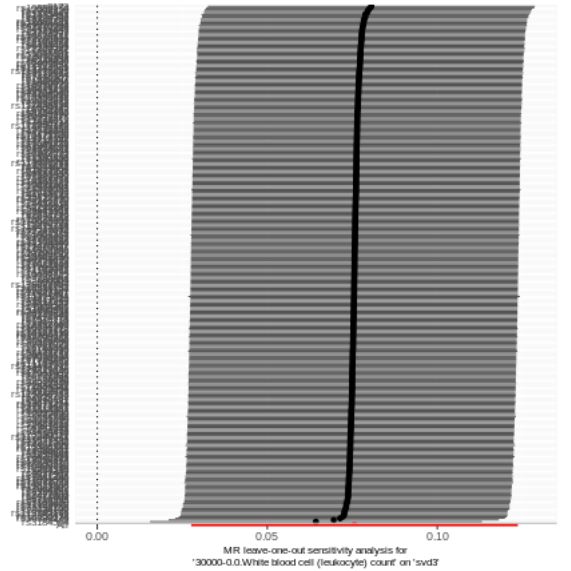

(c) Comparison of results using different MR methods

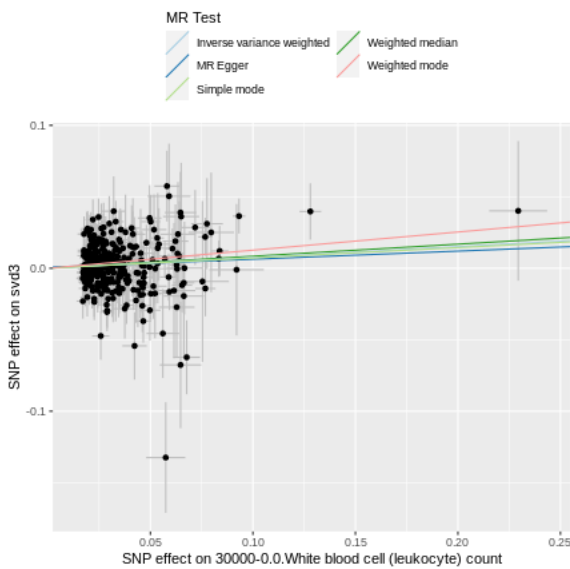

Supplement 3 Figure 28. The single SNP analysis, leave-one-out analysis, comparison of results using different MR methods for neutrophil count on non-lobar hemorrhage or SVS.

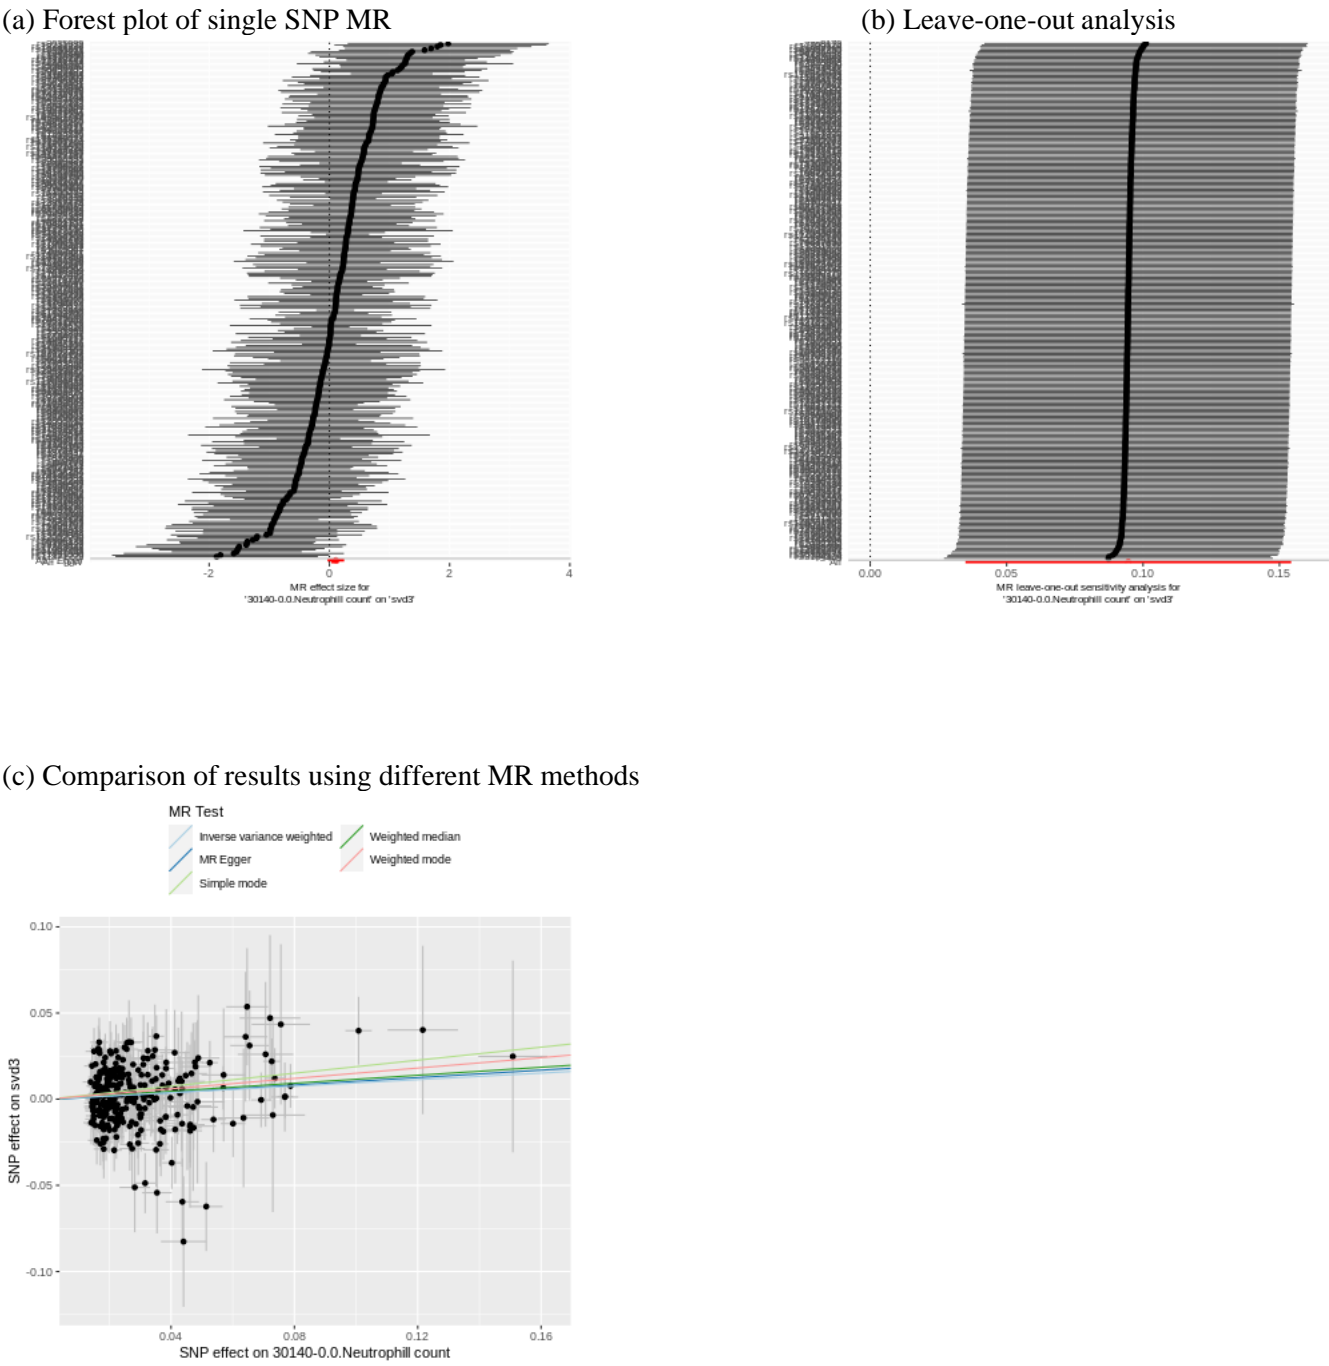



Supplement 3 Figure 29. The single SNP analysis, leave-one-out analysis, comparison of results using different MR methods for number of self-reported non-cancer illnesses on non-lobar hemorrhage or SVS.

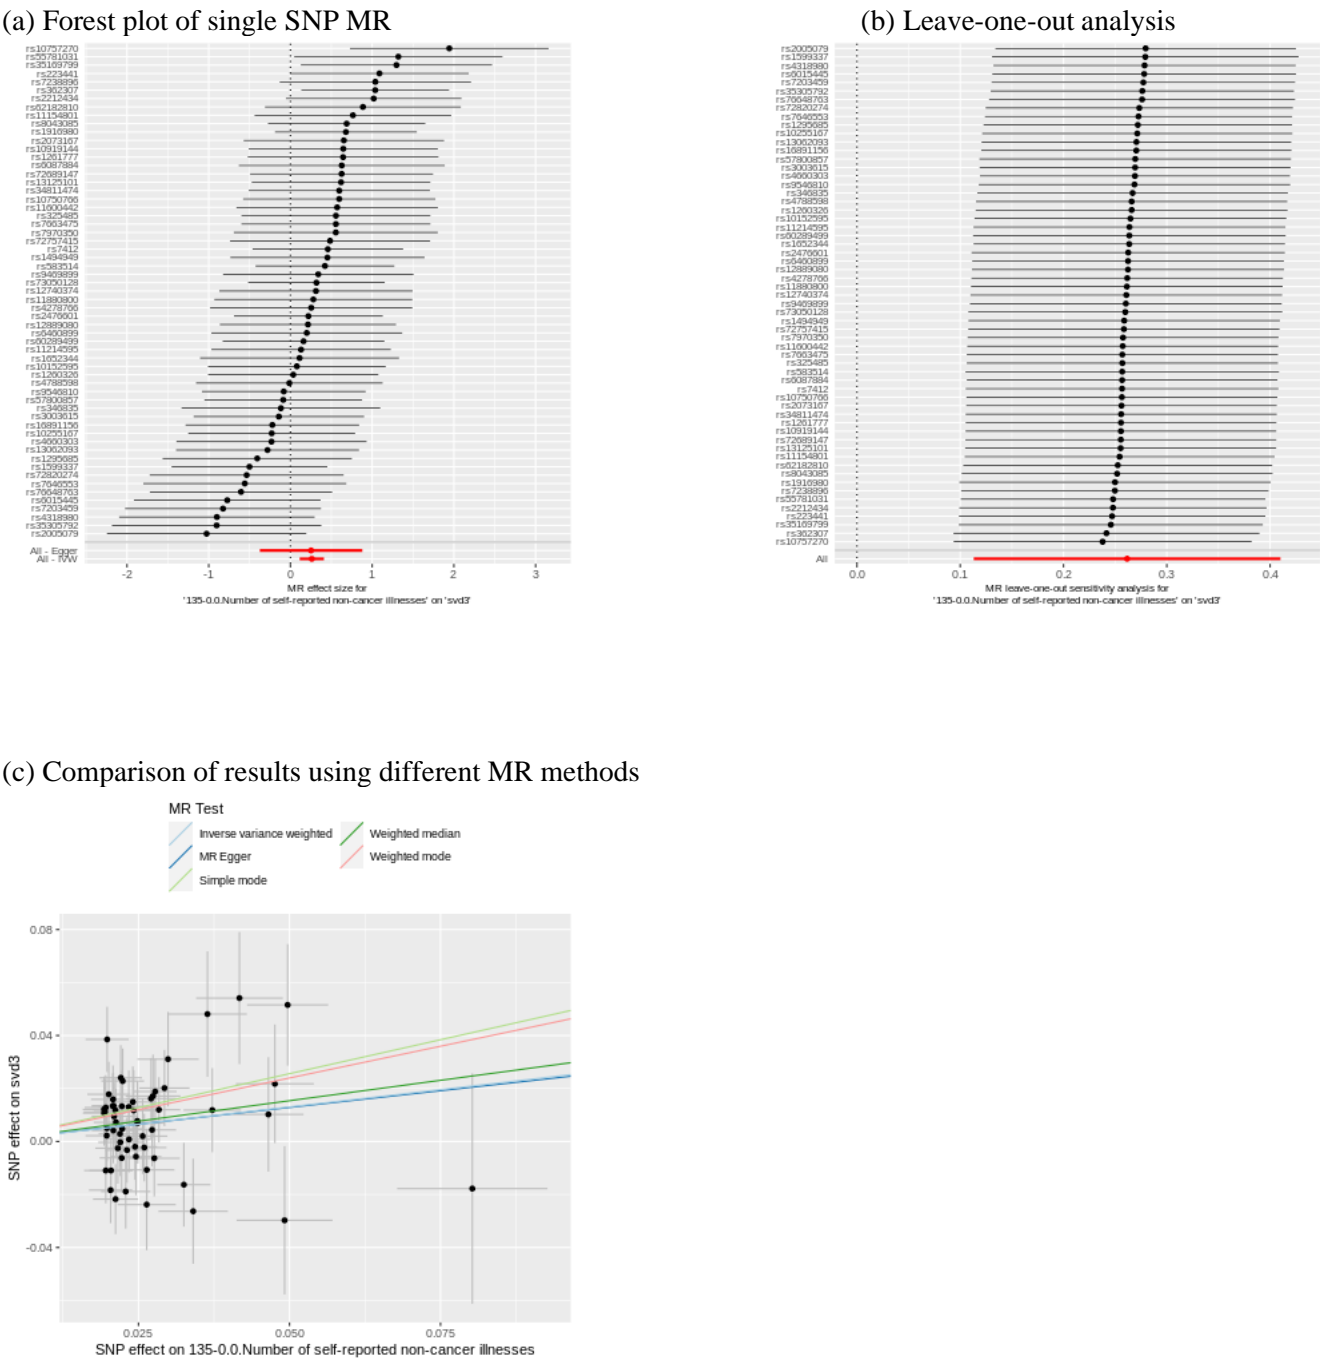

Supplement 3 Figure 30. The single SNP analysis, leave-one-out analysis, comparison of results using different MR methods for never smoked on ICH or SVS.

(a) Forest plot of single SNP MR

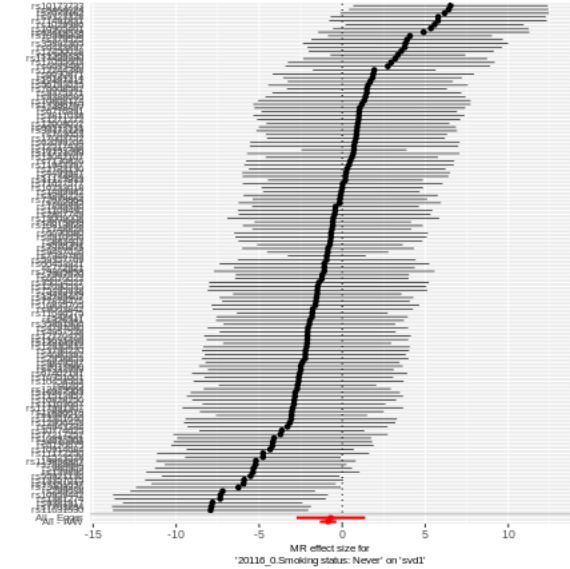

(b) Leave-one-out analysis

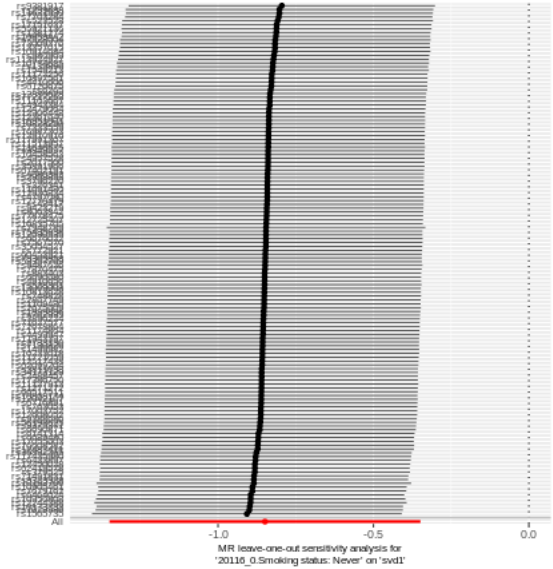

(c) Comparison of results using different MR methods

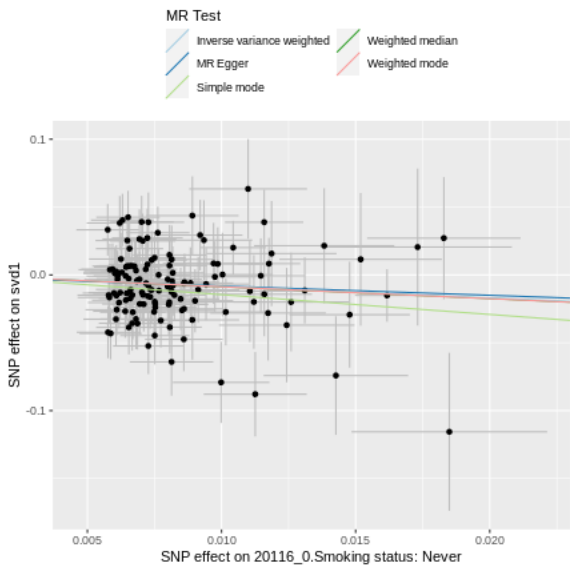

Supplement 3 Figure 31. The single SNP analysis, leave-one-out analysis, comparison of results using different MR methods for usual walking pace on ICH or SVS.

(a) Forest plot of single SNP MR

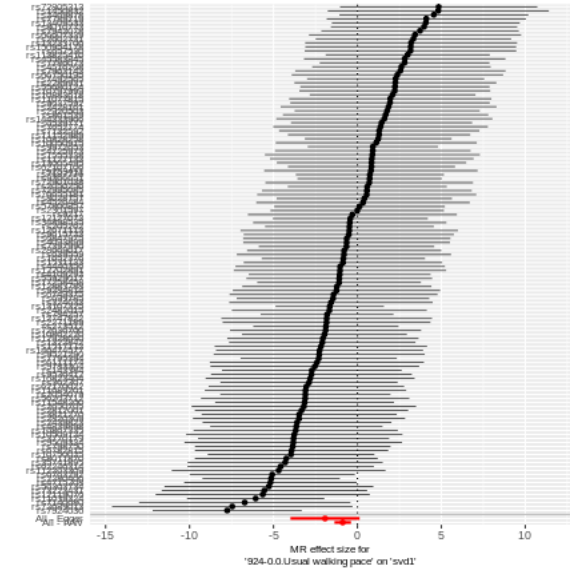

(b) Leave-one-out analysis

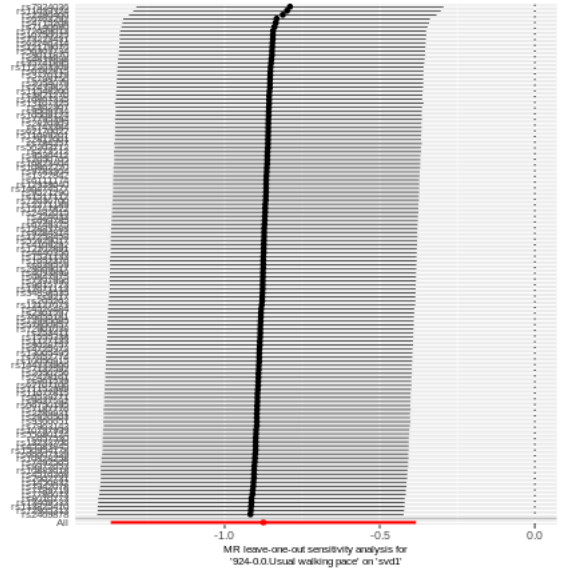

(c) Comparison of results using different MR methods

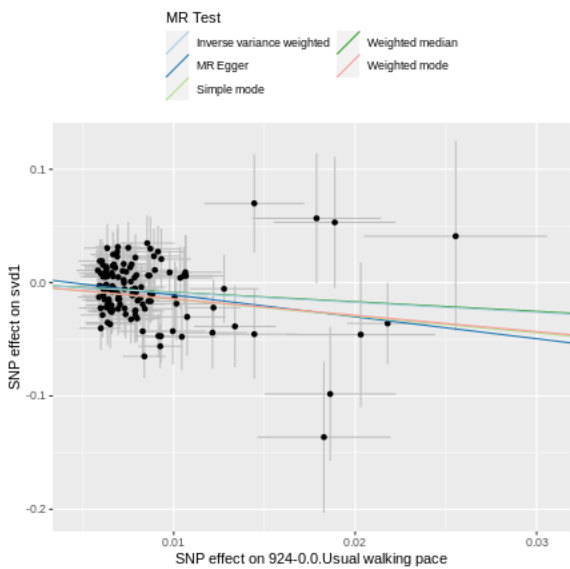

Supplement 3 Figure 32. The single SNP analysis, leave-one-out analysis, comparison of results using different MR methods for age first had sexual intercourse on ICH or SVS.

(a) Forest plot of single SNP MR

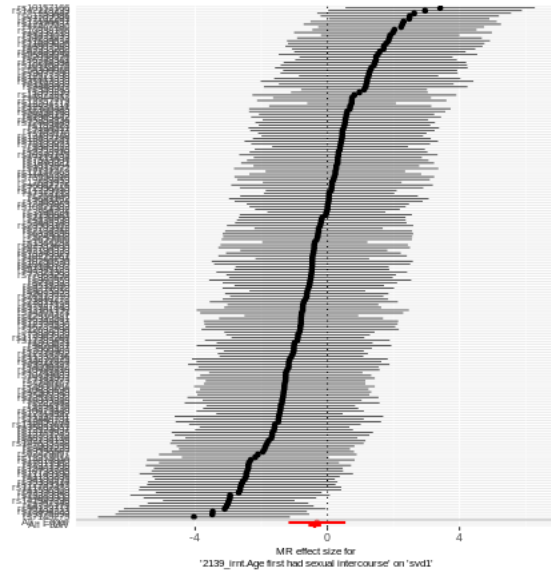

(b) Leave-one-out analysis

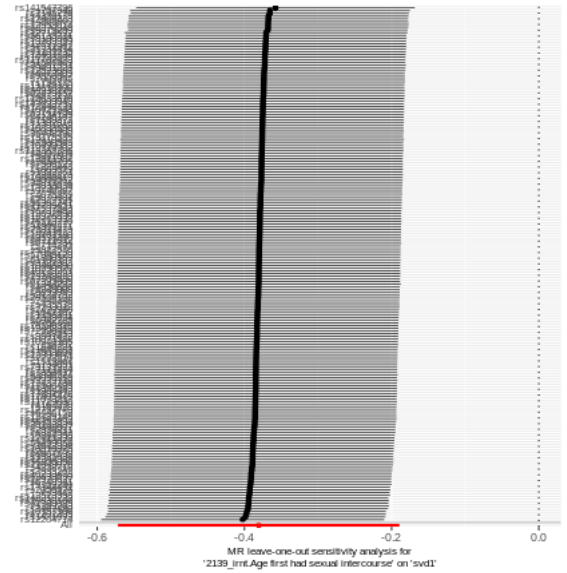

(c) Comparison of results using different MR methods

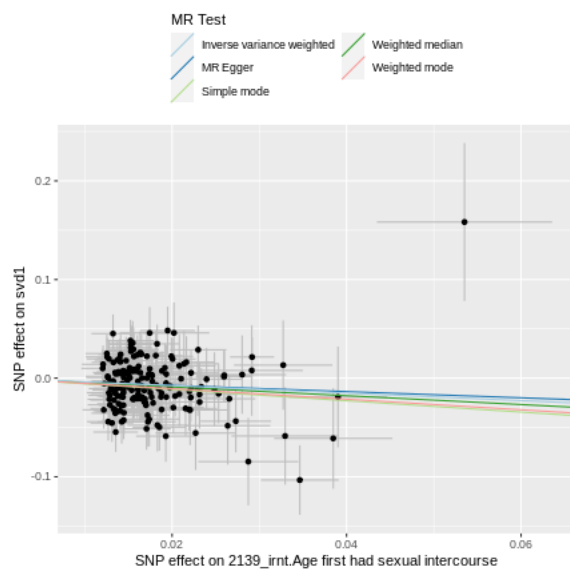

Supplement 3 Figure 33. The single SNP analysis, leave-one-out analysis, comparison of results using different MR methods for A /AS levels qualifications on ICH or SVS.

(a) Forest plot of single SNP MR

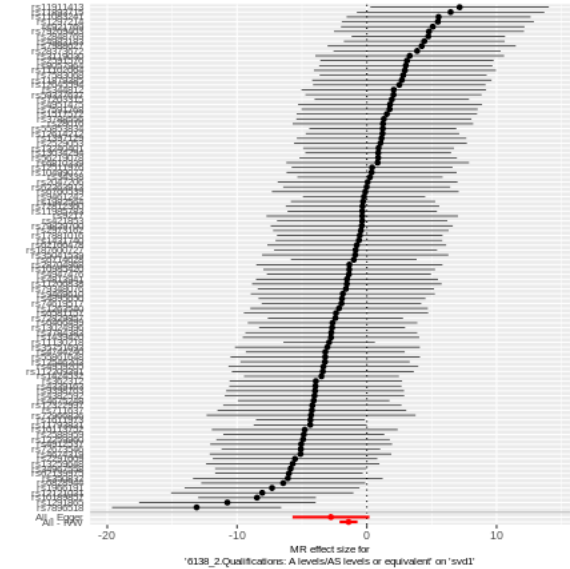

(b) Leave-one-out analysis

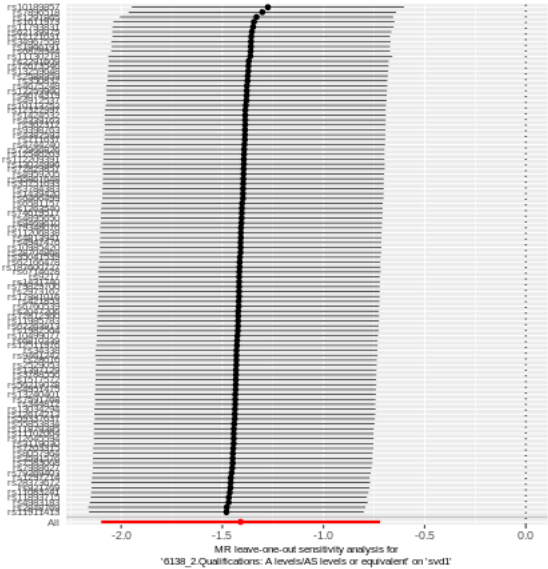

(c) Comparison of results using different MR methods

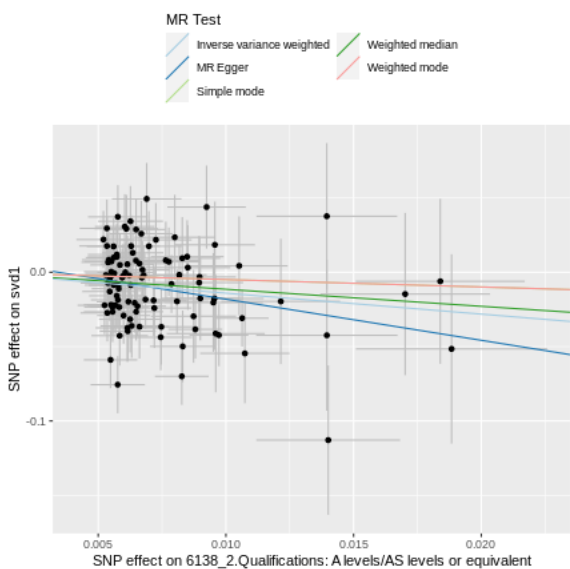

Supplement 3 Figure 34. The single SNP analysis, leave-one-out analysis, comparison of results using different MR methods for college or university degree on ICH or SVS.

(a) Forest plot of single SNP MR

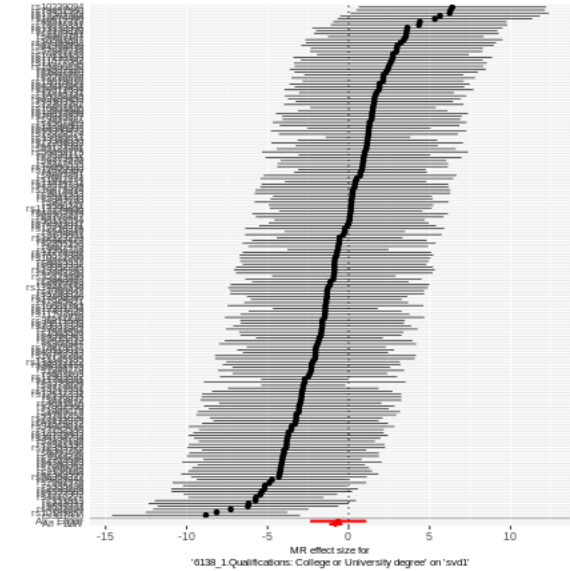

(b) Leave-one-out analysis

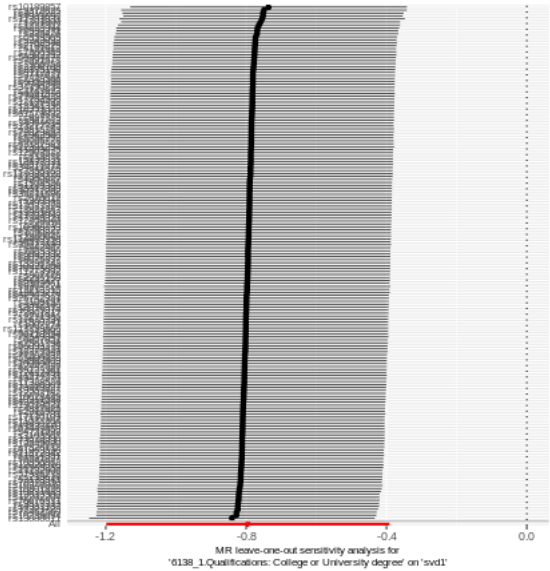

(c) Comparison of results using different MR methods

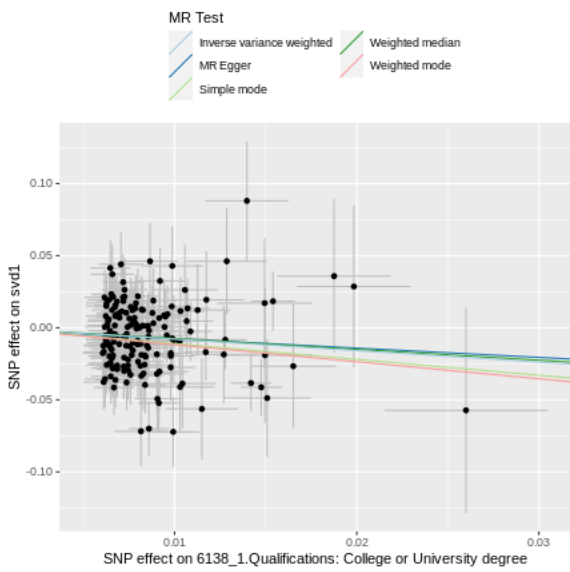

Supplement 3 Figure 35. The single SNP analysis, leave-one-out analysis, comparison of results using different MR methods for forced vital capacity (FVC) on ICH or SVS.

(a) Forest plot of single SNP MR

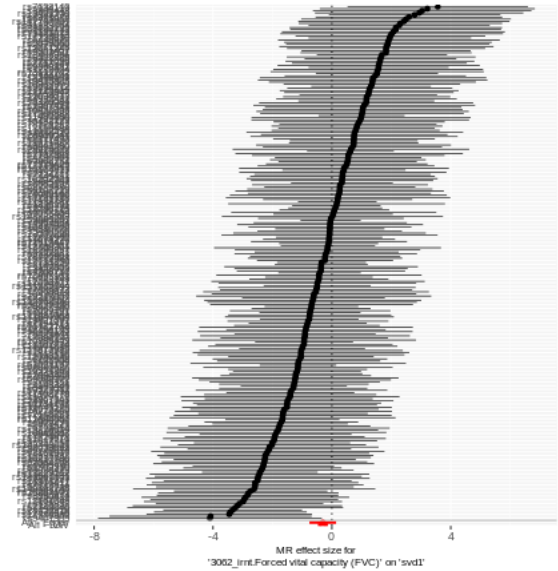

(b) Leave-one-out analysis

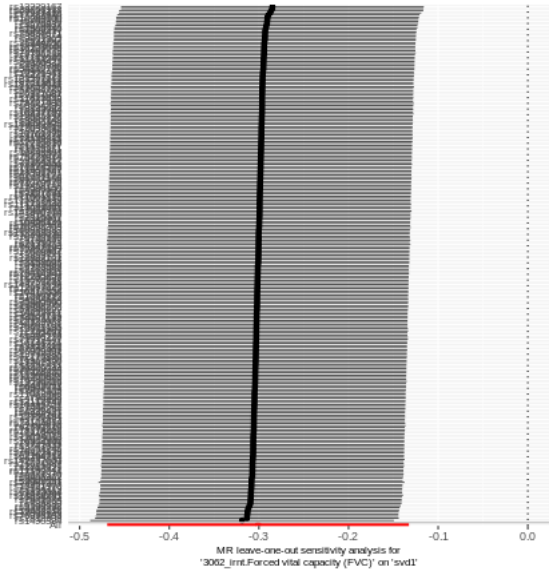

(c) Comparison of results using different MR methods

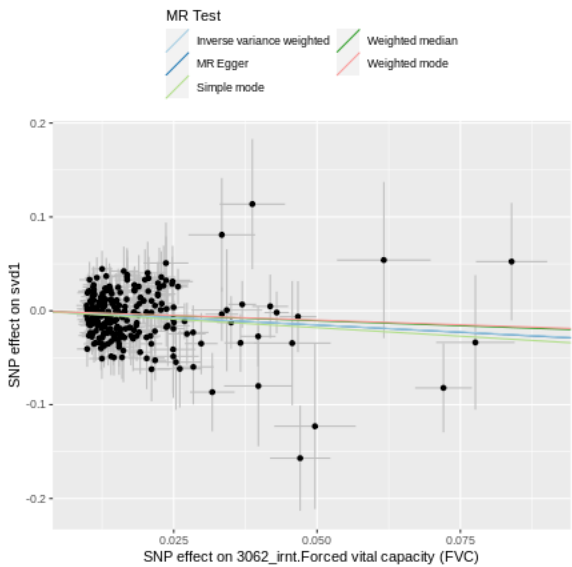

Supplement 3 Figure 36. The single SNP analysis, leave-one-out analysis, comparison of results using different MR methods for forced expiratory volume in 1-second (FEV1) on ICH or SVS.

(a) Forest plot of single SNP MR

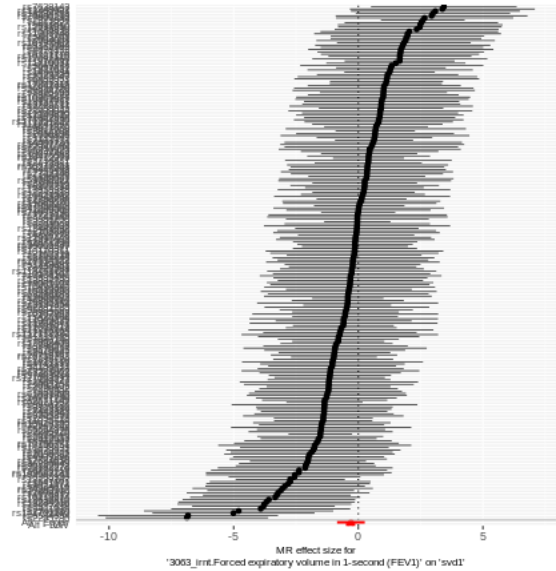

(b) Leave-one-out analysis

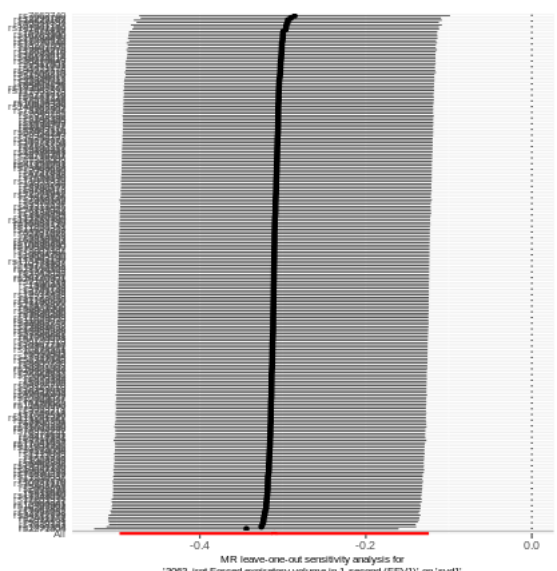

(c) Comparison of results using different MR methods

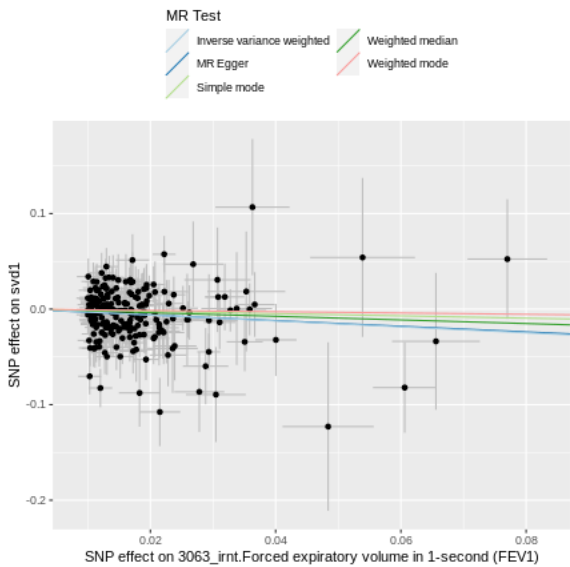



Supplement 3 Figure 37. The single SNP analysis, leave-one-out analysis, comparison of results using different MR methods for none of vascular/heart problems on ICH or SVS.

(a) Forest plot of single SNP MR

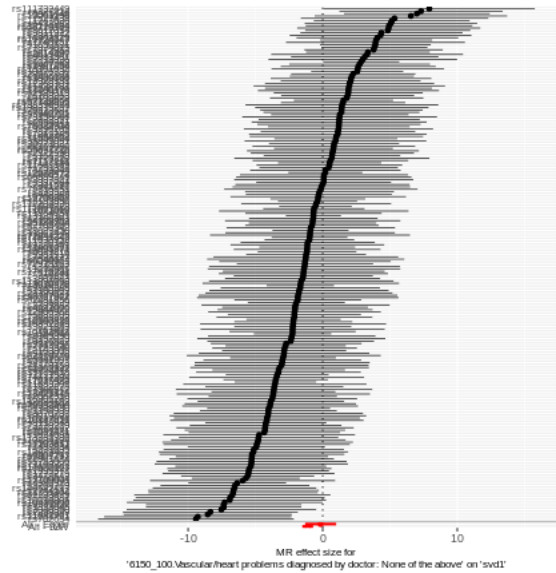

(b) Leave-one-out analysis

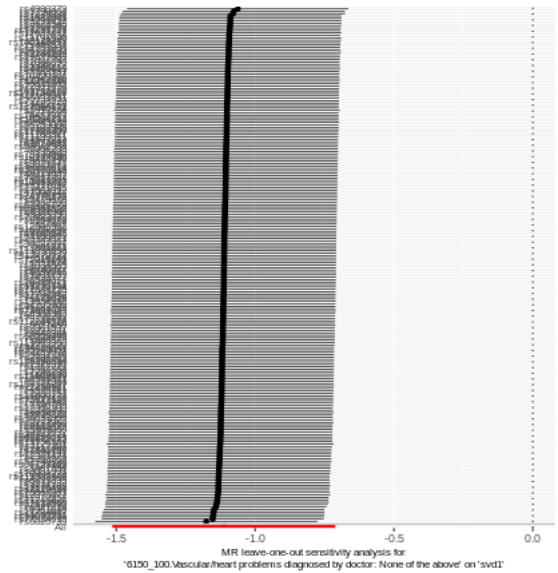

(c) Comparison of results using different MR methods

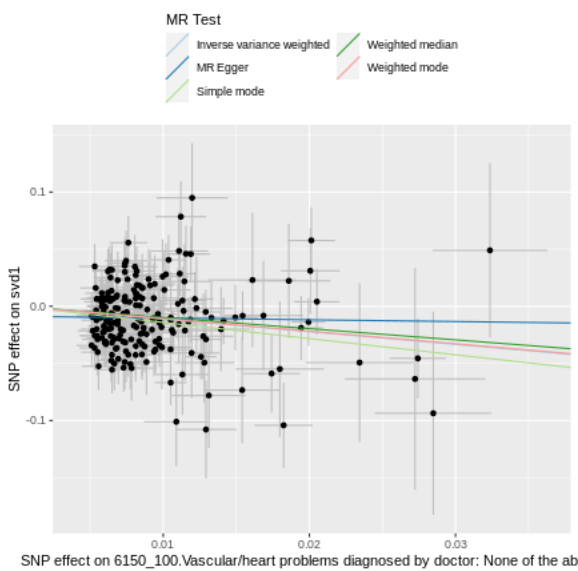

Supplement 3 Figure 38. The single SNP analysis, leave-one-out analysis, comparison of results using different MR methods for no medication for cholesterol, hypertension, diabetes, no exogenous hormones on ICH or SVS.

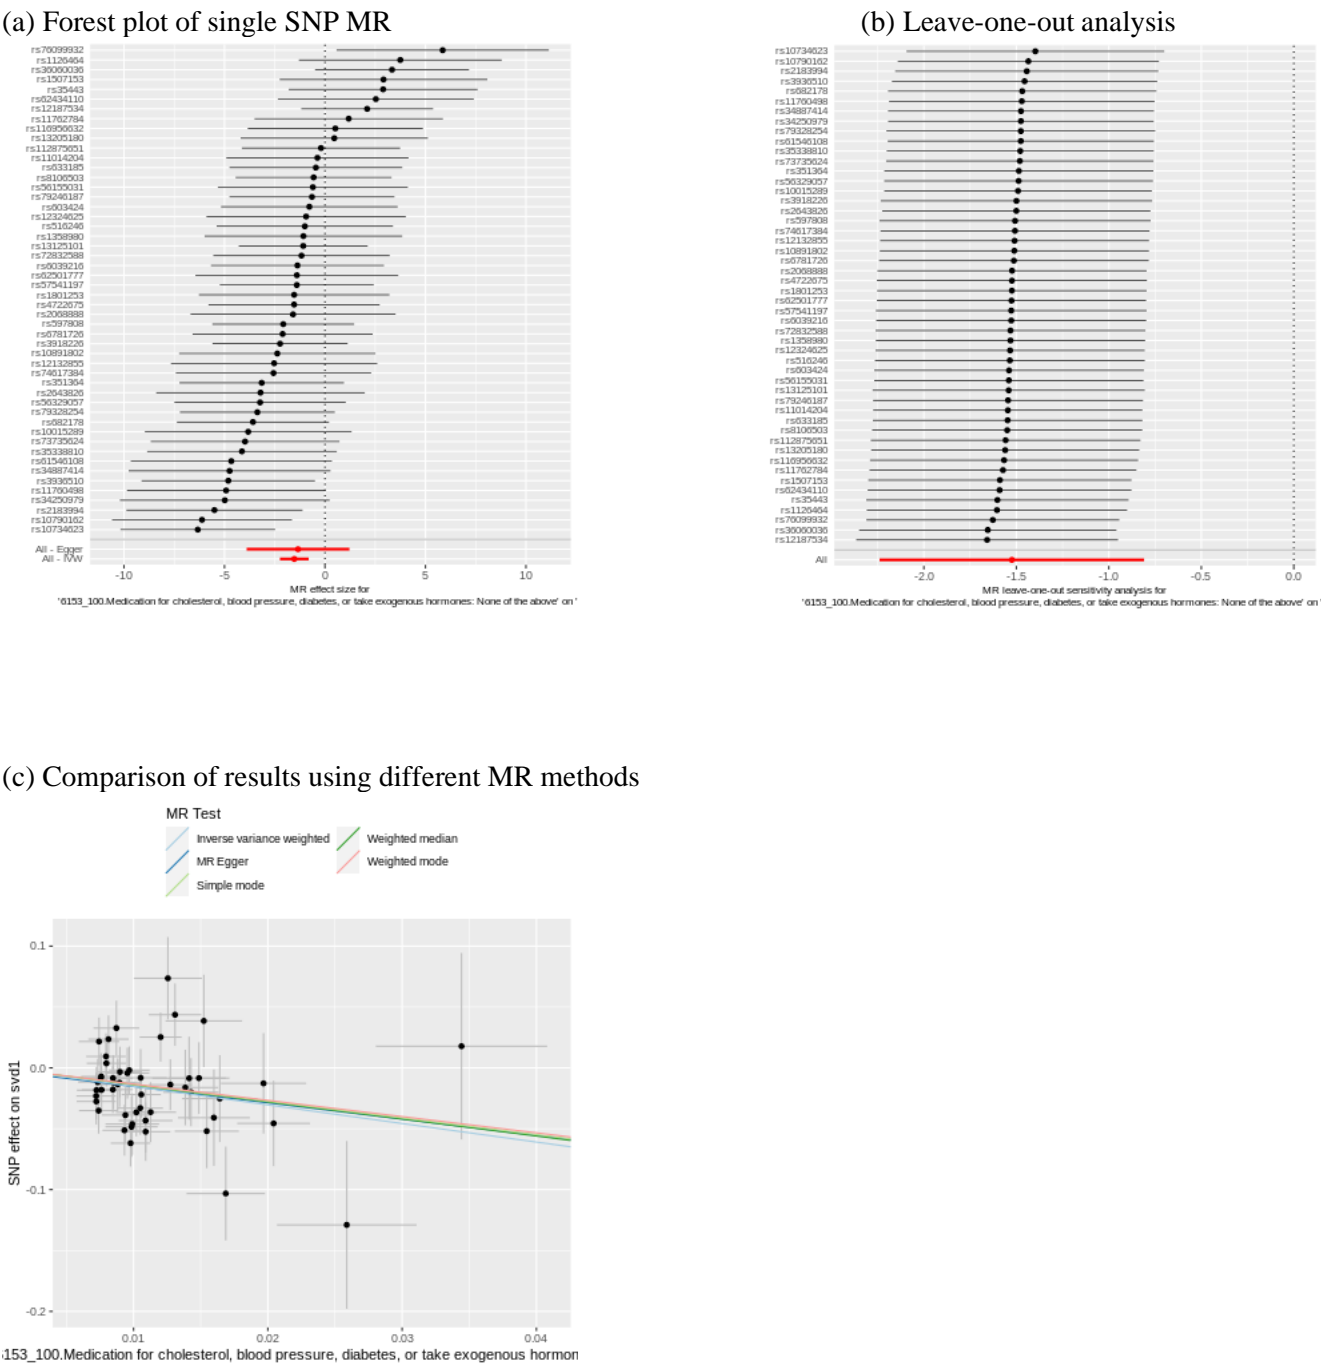

Supplement 3 Figure 39. The single SNP analysis, leave-one-out analysis, comparison of results using different MR methods for standing height on lobar hemorrhage or SVS.

(a) Forest plot of single SNP MR

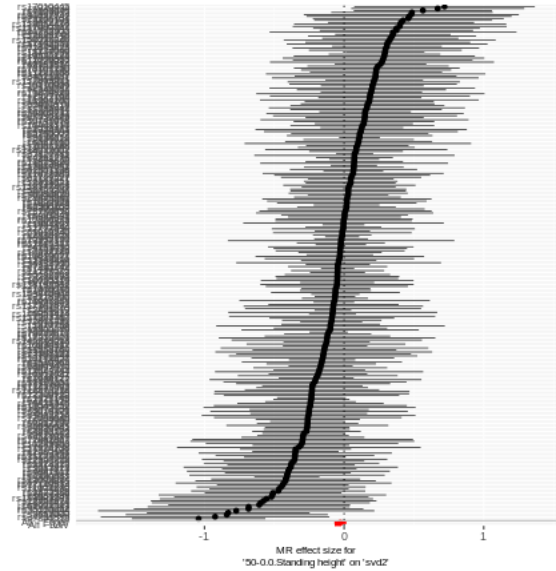

(b) Leave-one-out analysis

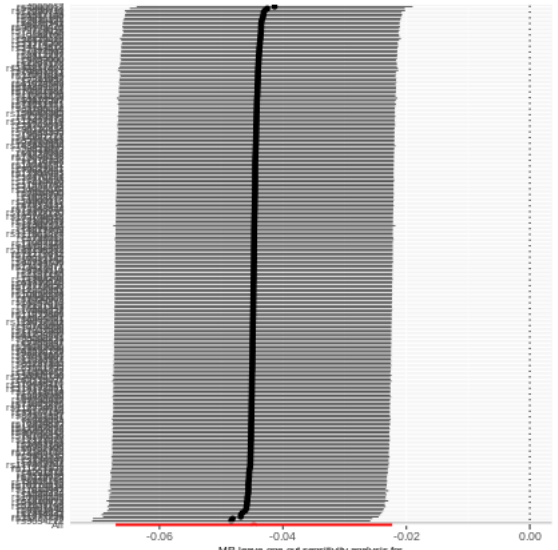

(c) Comparison of results using different MR methods

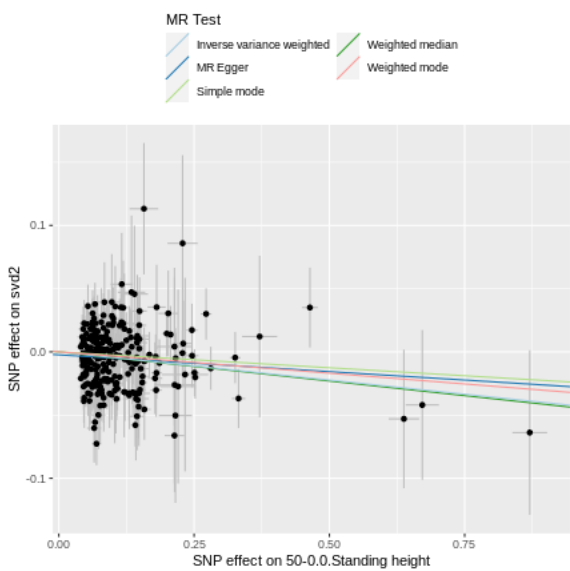

Supplement 3 Figure 40. The single SNP analysis, leave-one-out analysis, comparison of results using different MR methods for cheese intake on non-lobar hemorrhage or SVS.

(a) Forest plot of single SNP MR

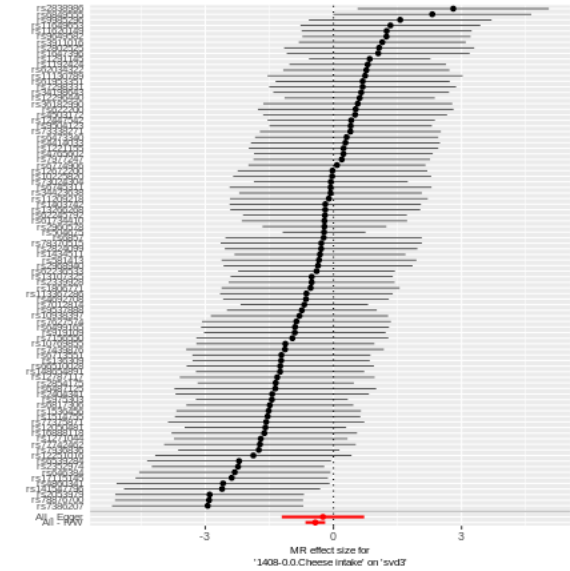

(b) Leave-one-out analysis

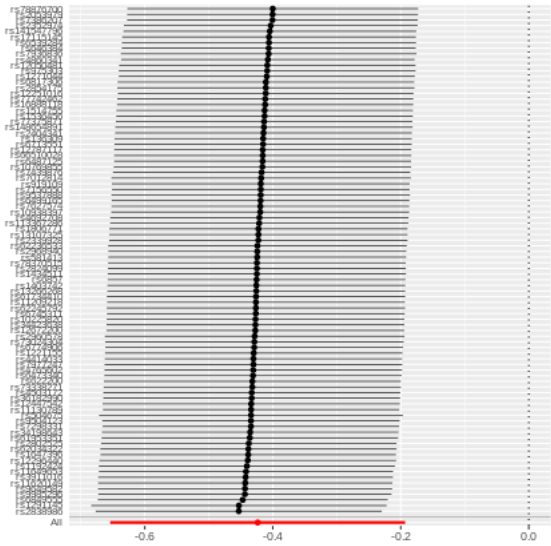

(c) Comparison of results using different MR methods

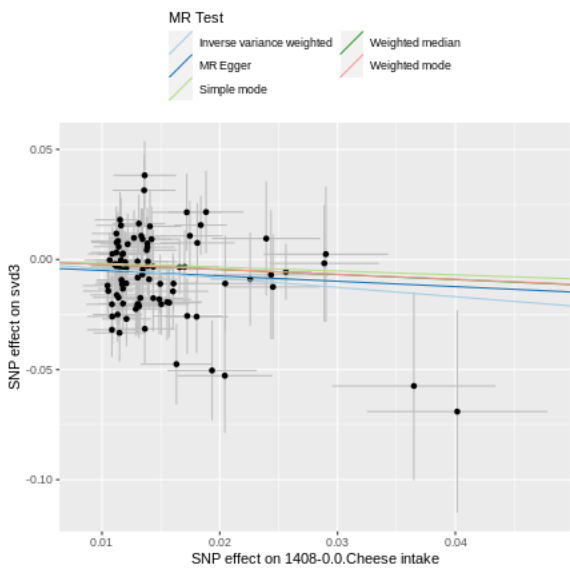

Supplement 3 Figure 41. The single SNP analysis, leave-one-out analysis, comparison of results using different MR methods for none of illnesses of siblings on non-lobar hemorrhage or SVS.

(a) Forest plot of single SNP MR

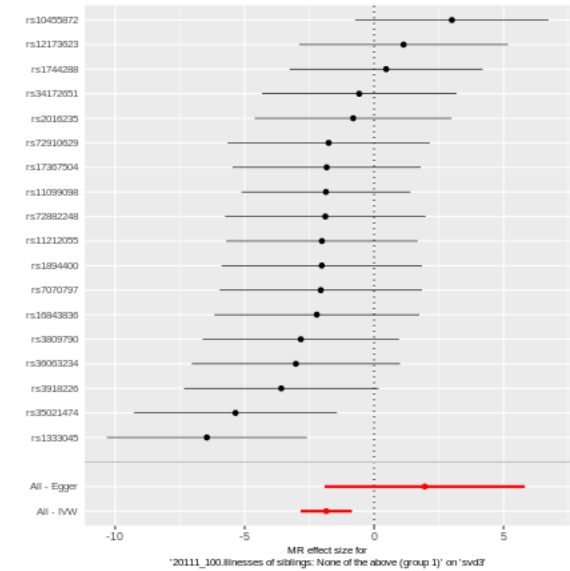

(b) Leave-one-out analysis

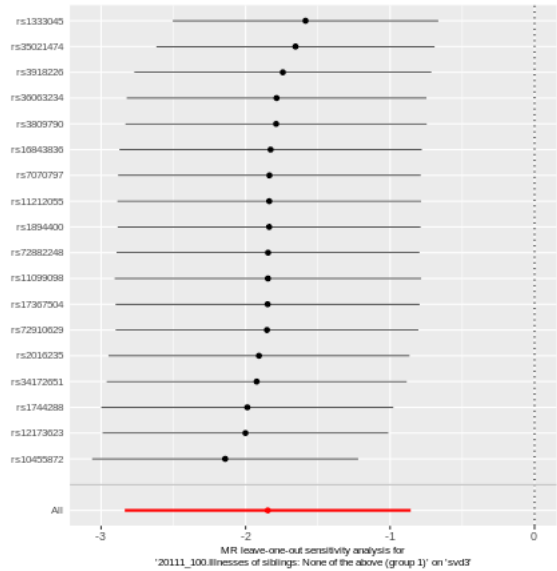

(c) Comparison of results using different MR methods

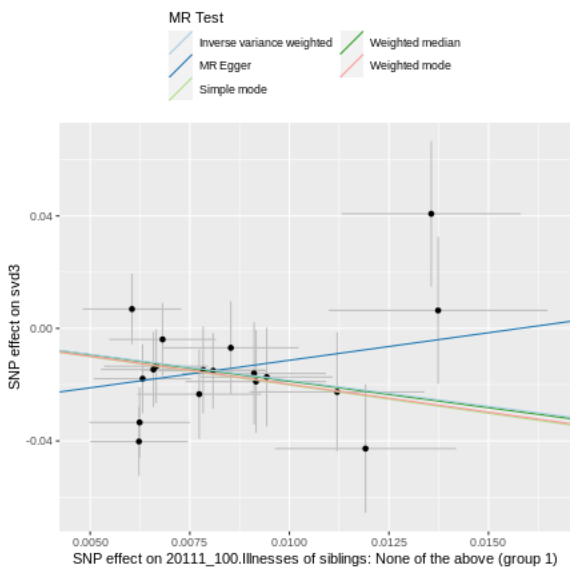

Supplement 3 Figure 42. The single SNP analysis, leave-one-out analysis, comparison of results using different MR methods for peak expiratory flow (PEF) on non-lobar hemorrhage or SVS.

(a) Forest plot of single SNP MR

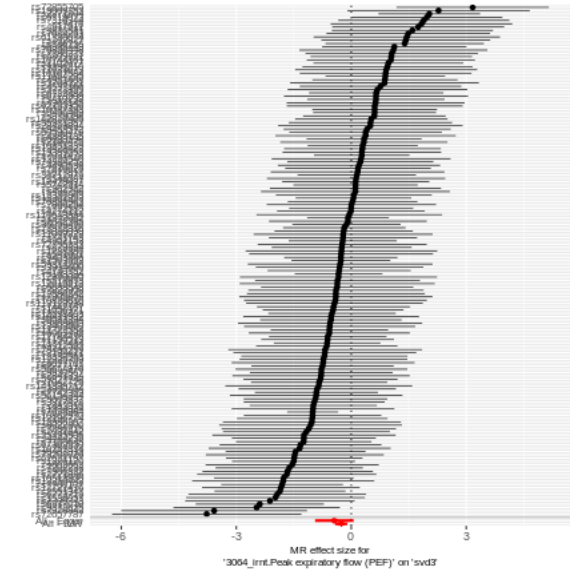

(b) Leave-one-out analysis

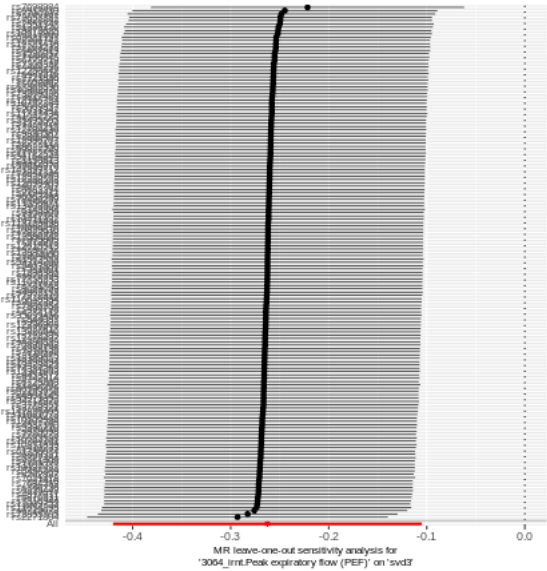

(c) Comparison of results using different MR methods

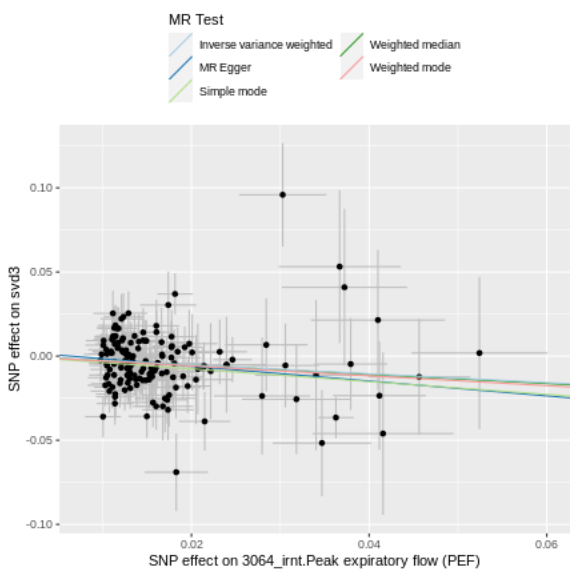

## Supplement 4 The single SNP analysis, leave-one-out analyses and comparison of results using different MR methods for 10 exposures with $P_{FDR} < 0.05$ for WMH

Supplement 4 Figure 1. The single SNP analysis, leave-one-out analysis, comparison of results using different MR methods for self-reported hypertension on WMH.

(a) Forest plot of single SNP MR

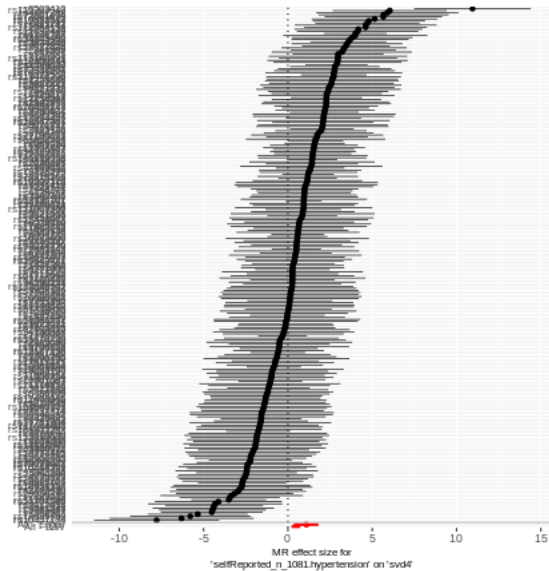

(b) Leave-one-out analysis

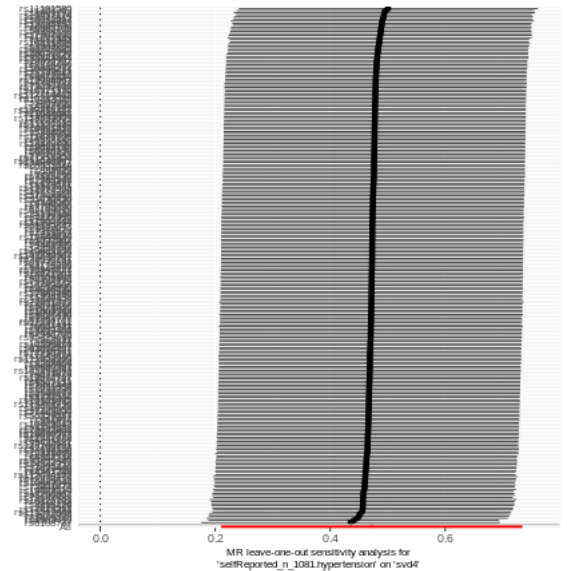

(c) Comparison of results using different MR methods

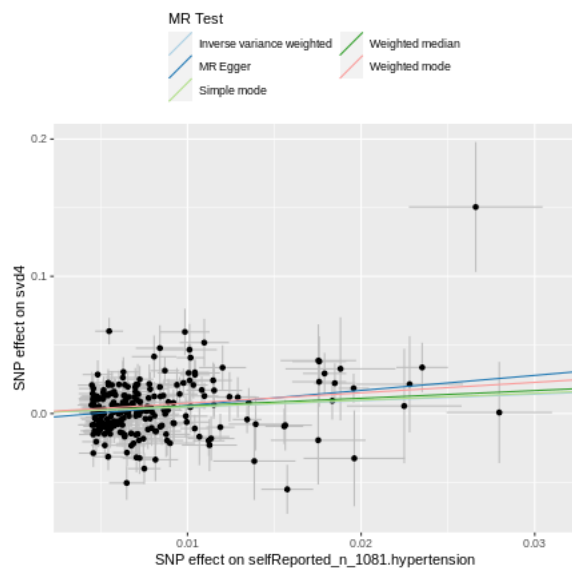

Supplement 4 Figure 2. The single SNP analysis, leave-one-out analysis, comparison of results using different MR methods for hypertension diagnosed by doctor on WMH

(a) Forest plot of single SNP MR

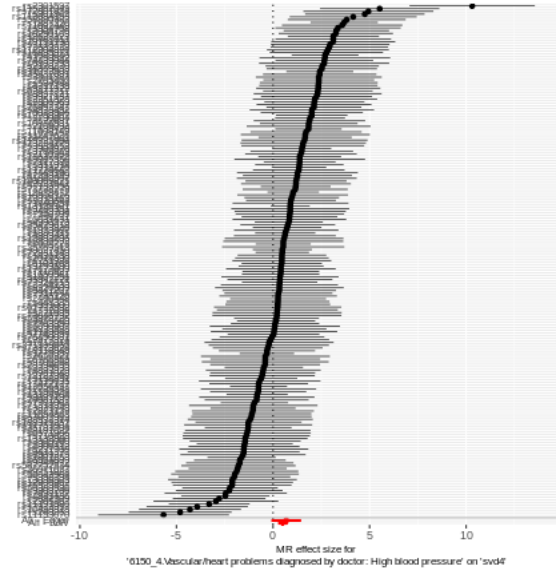

(b) Leave-one-out analysis

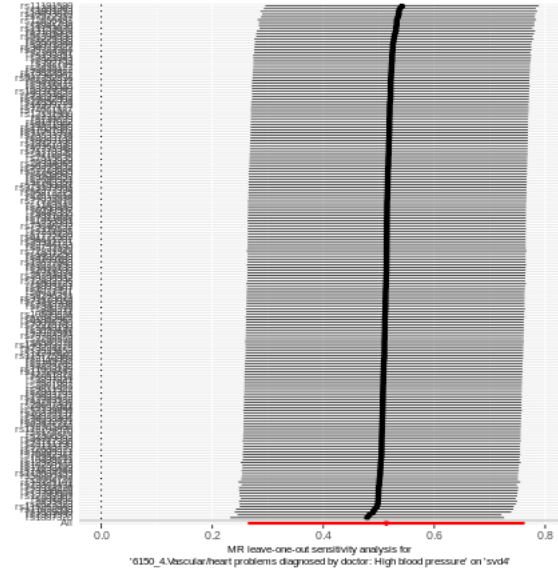

(c) Comparison of results using different MR methods

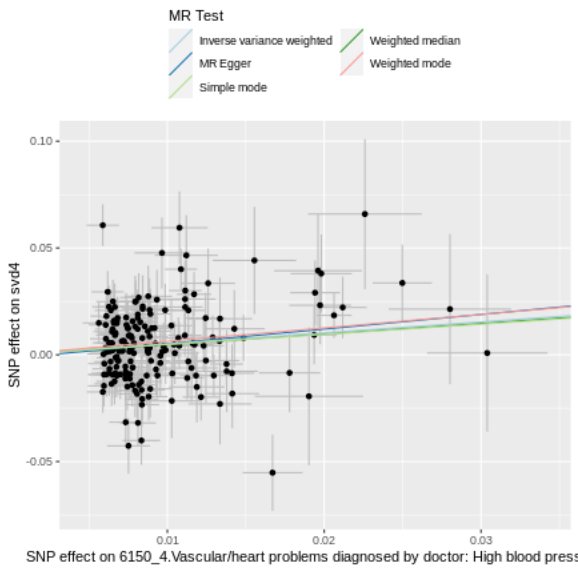



Supplement 4 Figure 3. The single SNP analysis, leave-one-out analysis, comparison of results using different MR methods for leg fat-free mass (right) on WMH

(a) Forest plot of single SNP MR

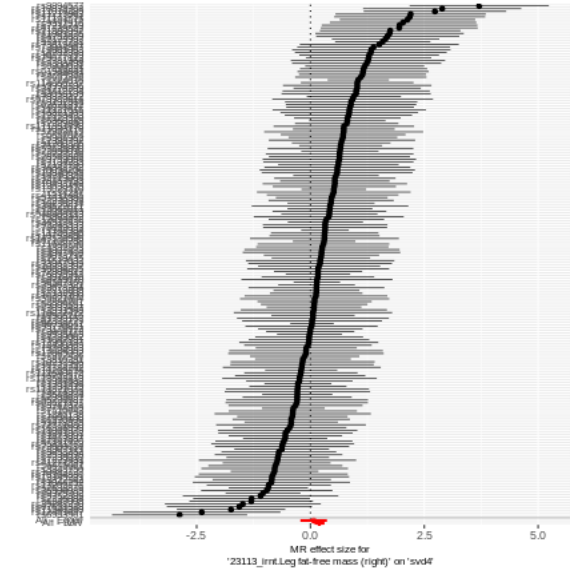

(b) Leave-one-out analysis

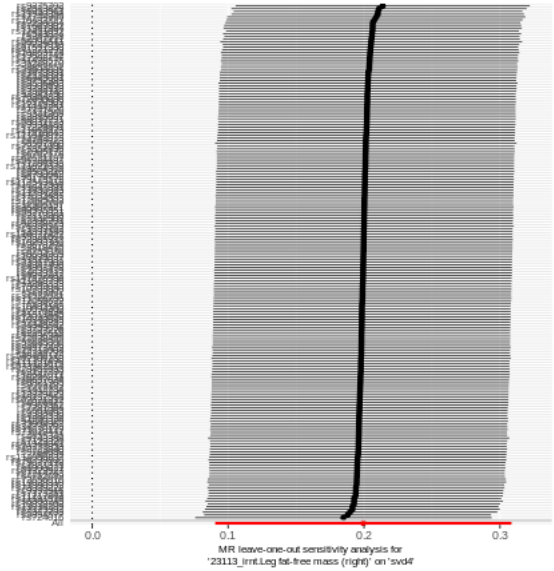

(c) Comparison of results using different MR methods

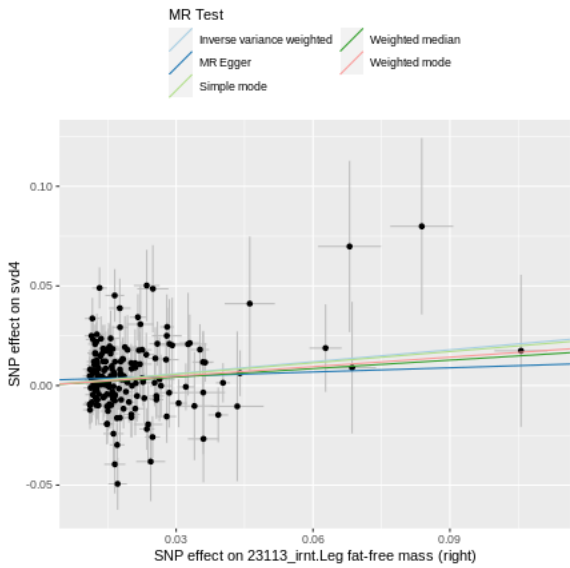

Supplement 4 Figure 4. The single SNP analysis, leave-one-out analysis, comparison of results using different MR methods for arm fat-free mass (left) on WMH

(a) Forest plot of single SNP MR

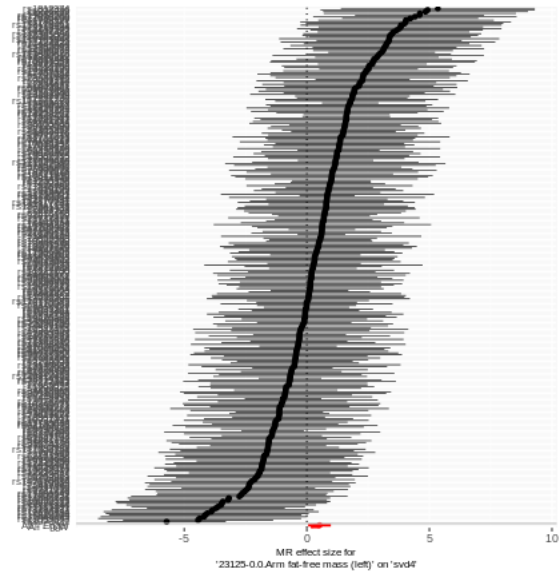

(b) Leave-one-out analysis

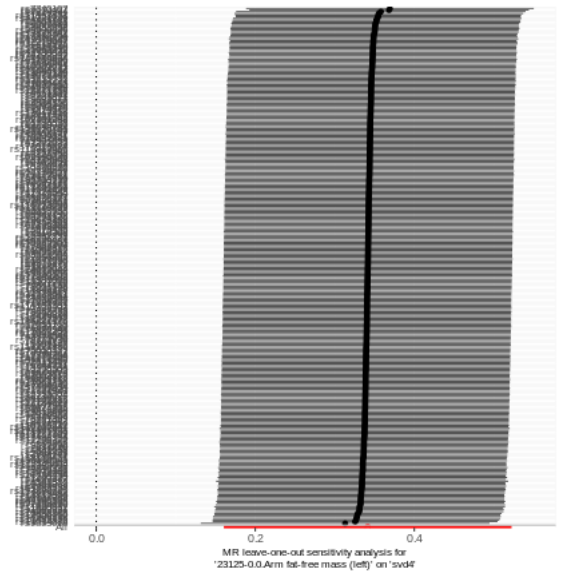

(c) Comparison of results using different MR methods

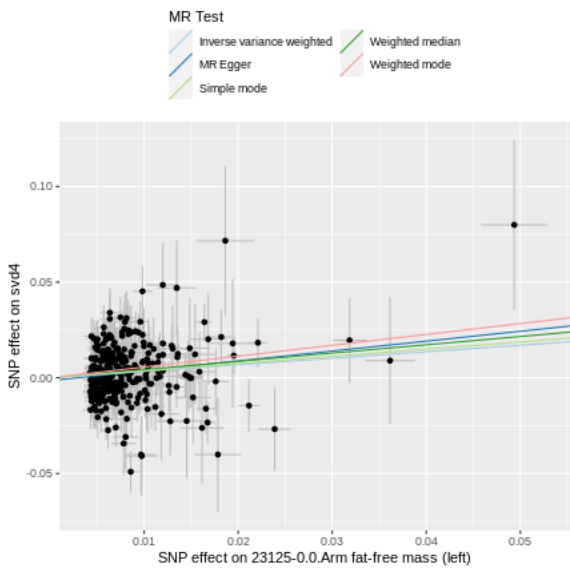

Supplement 4 Figure 5. The single SNP analysis, leave-one-out analysis, comparison of results using different MR methods for leg predicted mass (right) on WMH

(a) Forest plot of single SNP MR

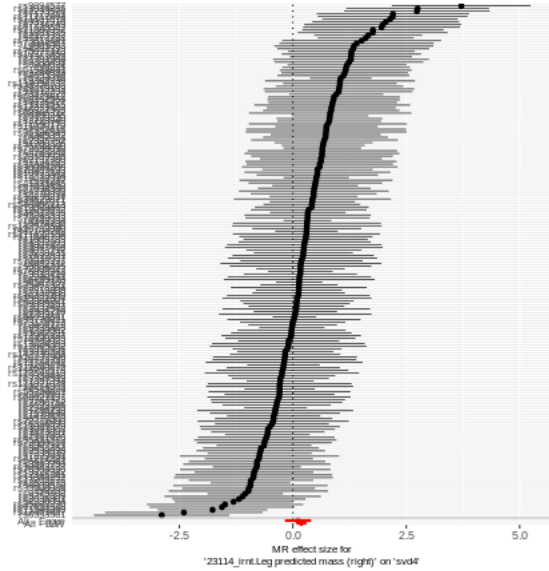

(b) Leave-one-out analysis

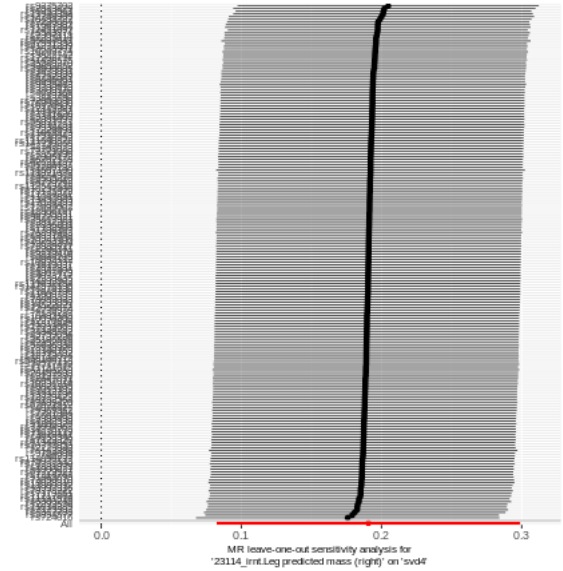

(c) Comparison of results using different MR methods

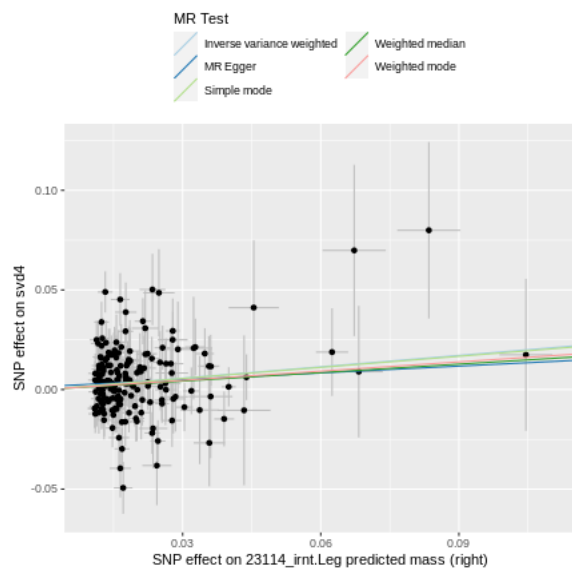

Supplement 4 Figure 6. The single SNP analysis, leave-one-out analysis, comparison of results using different MR methods for leg predicted mass (left) on WMH

(a) Forest plot of single SNP MR

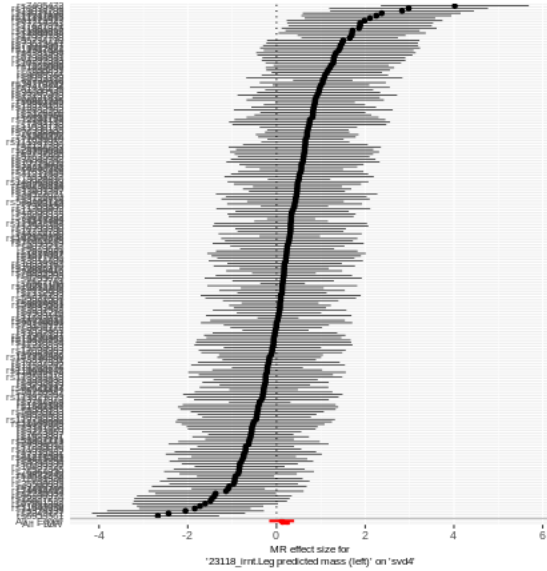

(b) Leave-one-out analysis

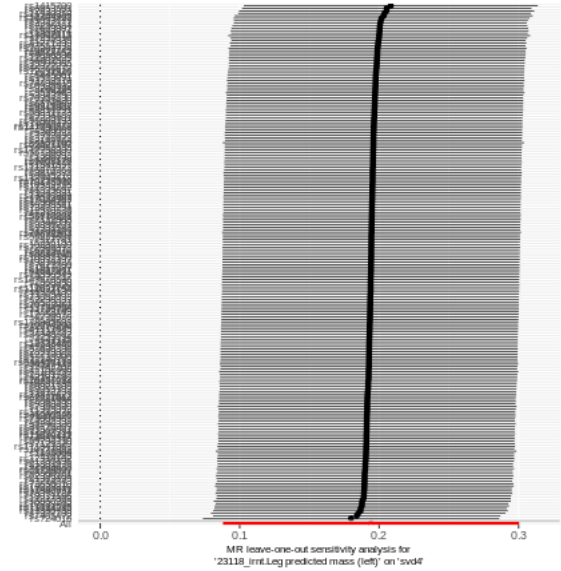

(c) Comparison of results using different MR methods

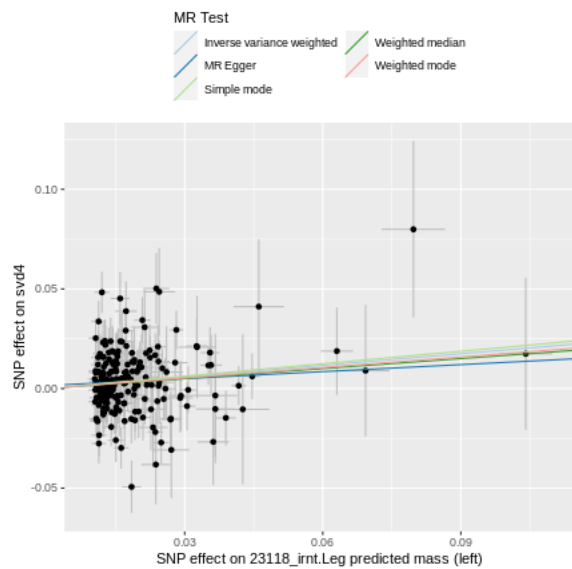

Supplement 4 Figure 7. The single SNP analysis, leave-one-out analysis, comparison of results using different MR methods for sitting height on WMH

(a) Forest plot of single SNP MR

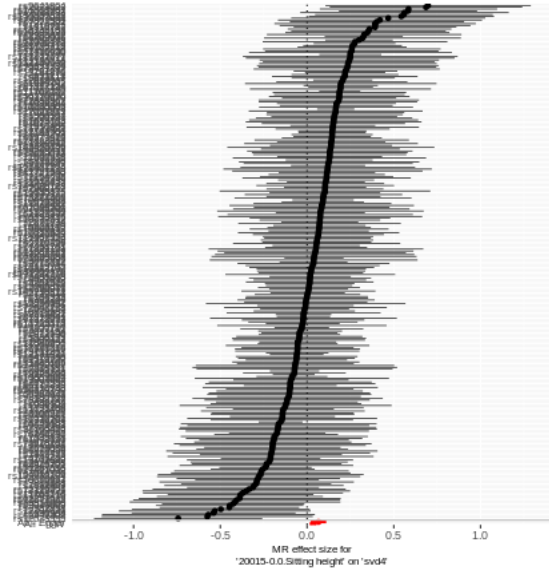

(b) Leave-one-out analysis

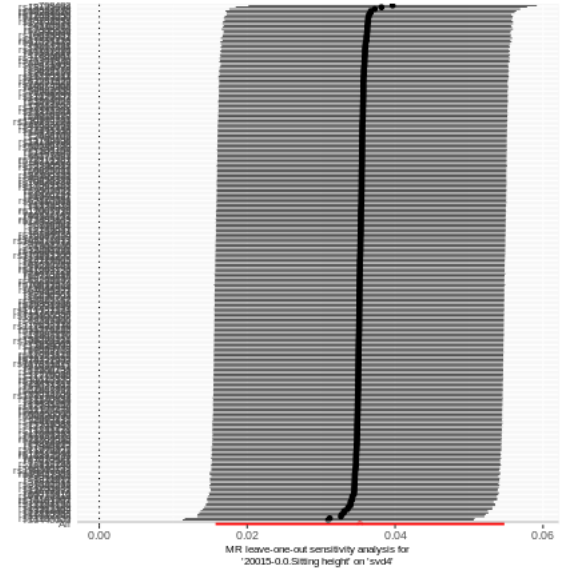

(c) Comparison of results using different MR methods

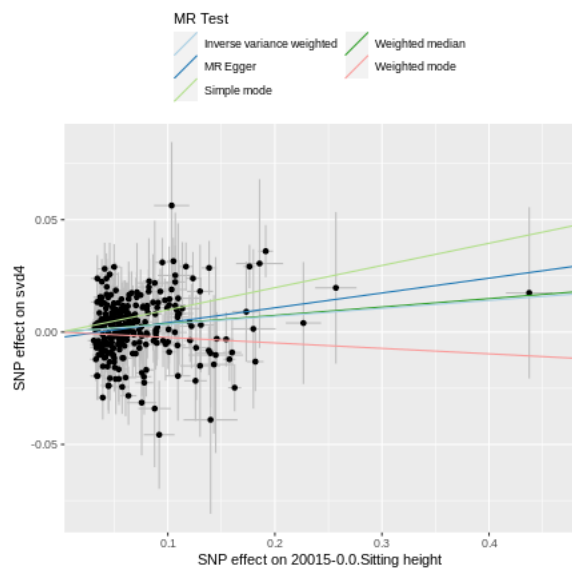

Supplement 4 Figure 8. The single SNP analysis, leave-one-out analysis, comparison of results using different MR methods for none of vascular/heart problems on WMH

(a) Forest plot of single SNP MR

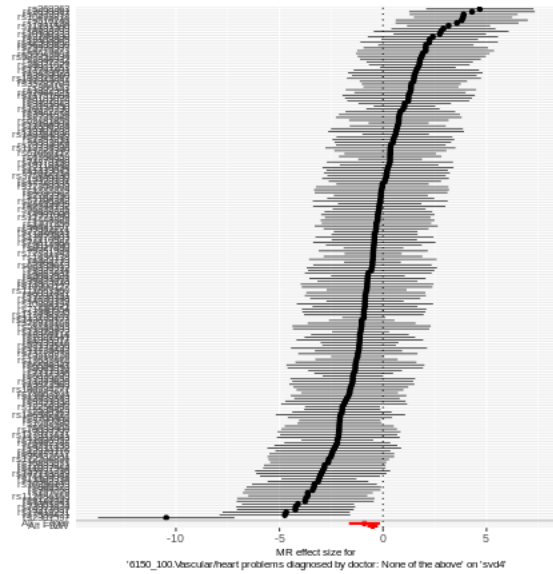

(b) Leave-one-out analysis

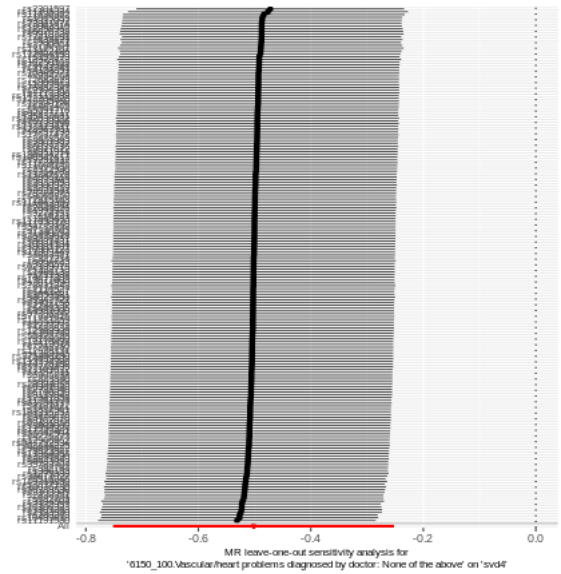

(c) Comparison of results using different MR methods

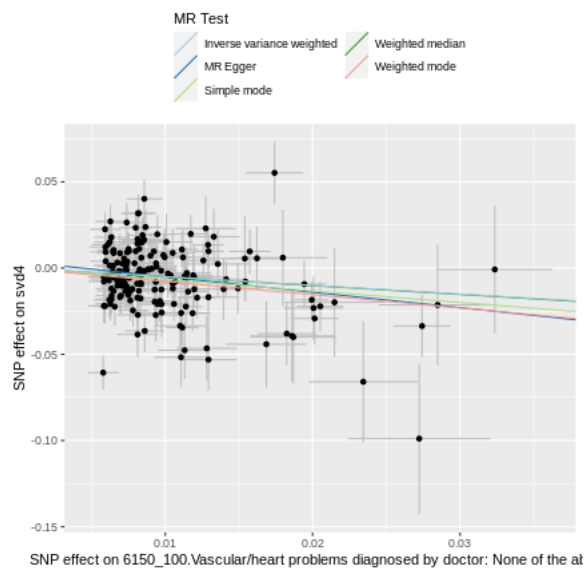

Supplement 4 Figure 9. The single SNP analysis, leave-one-out analysis, comparison of results using different MR methods for impedance of leg (right) on WMH

(a) Forest plot of single SNP MR

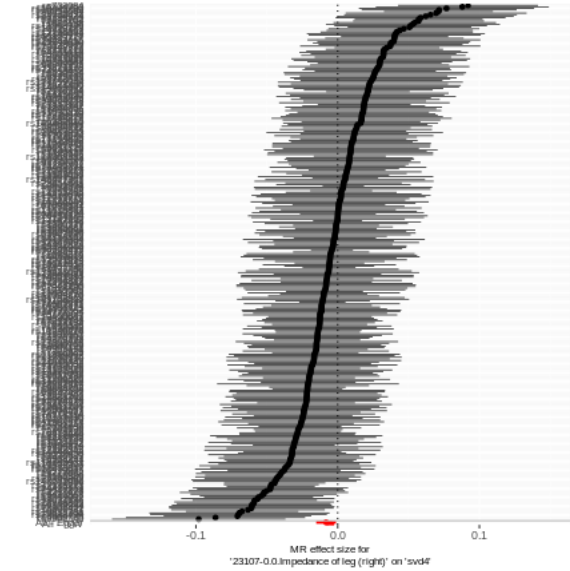

(b) Leave-one-out analysis

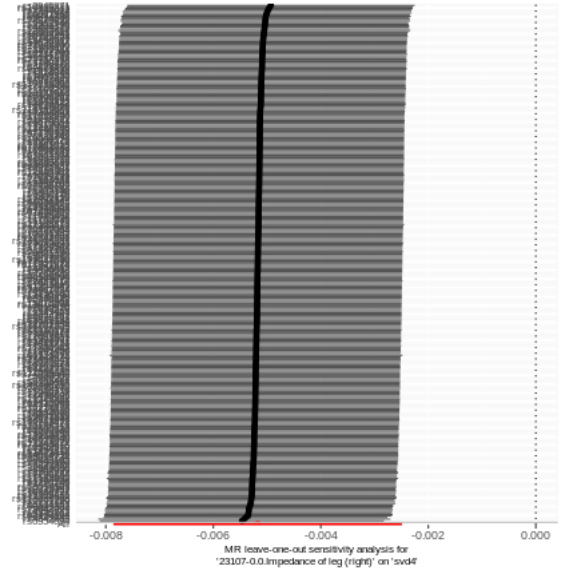

(c) Comparison of results using different MR methods

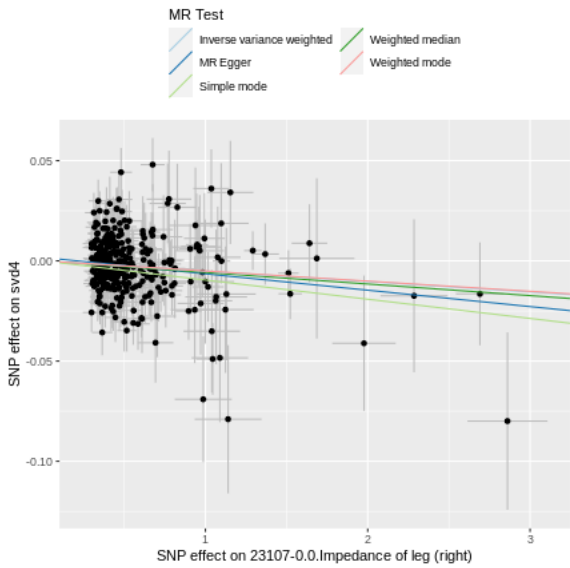

Supplement 4 Figure 10. The single SNP analysis, leave-one-out analysis, comparison of results using different MR methods for no medication for cholesterol, hypertension or diabetes on WMH

(a) Forest plot of single SNP MR

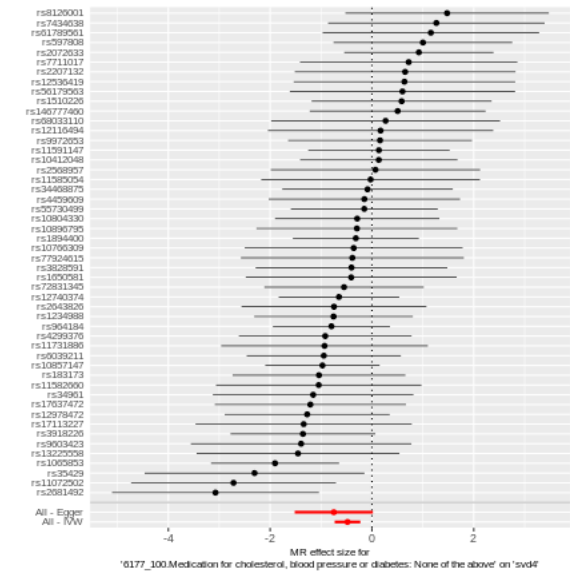

(b) Leave-one-out analysis

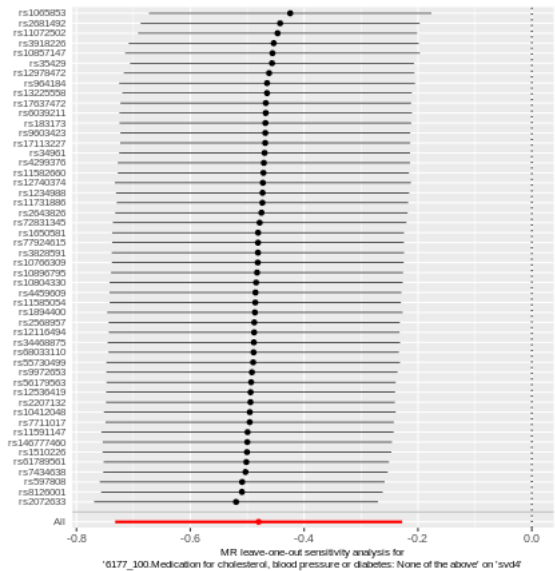

(c) Comparison of results using different MR methods

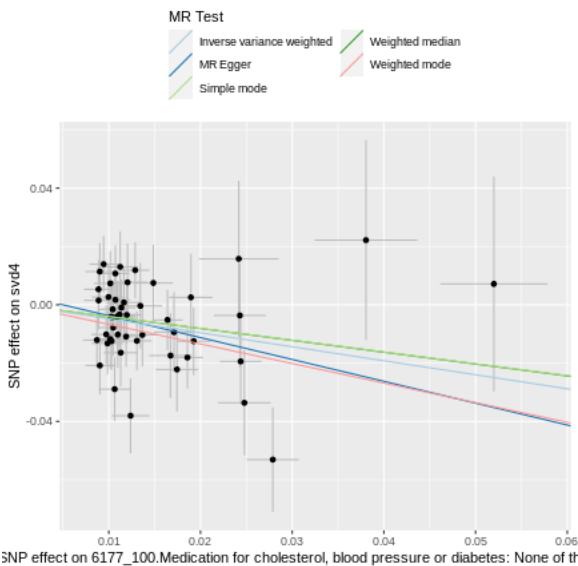



**Supplement 5 Table I. IVW analyses, sensitivity, horizontal pleiotropy and heterogeneity analyses for exposures with  $P_{FDR}<0.05$  for MD.**

| Risk exposures                                              | IVW  |          |       | Sensitivity analysis |                   | Horizontal pleiotropy | Heterogeneity   |
|-------------------------------------------------------------|------|----------|-------|----------------------|-------------------|-----------------------|-----------------|
|                                                             | SNPs | IVW P    | FDR P | MR Egger P           | Weighted Median P | Egger intercept P     | IVW Q test P    |
| Hypertension: self-reported <sup>a,b</sup>                  | 266  | 3.64E-06 | 0.002 | <b>0.022</b>         | <b>7.18E-04</b>   | 0.449                 | <b>1.85E-05</b> |
| Hypertension: diagnosed by doctor <sup>a,b</sup>            | 263  | 4.02E-06 | 0.002 | <b>0.009</b>         | <b>5.81E-04</b>   | 0.272                 | <b>2.85E-07</b> |
| Antihypertensive medication <sup>b</sup>                    | 56   | 4.37E-04 | 0.026 | <b>0.007</b>         | <b>2.65E-04</b>   | 0.070                 | <b>0.002</b>    |
| Family relationship satisfaction <sup>a</sup>               | 6    | 2.22E-04 | 0.036 | 0.342                | <b>5.29E-03</b>   | 0.948                 | 0.249           |
| <b>Protective exposures</b>                                 |      |          |       |                      |                   |                       |                 |
| Leg fat percentage (left) <sup>b</sup>                      | 337  | 8.90E-04 | 0.040 | 0.264                | 9.38E-02          | 0.956                 | <b>0.003</b>    |
| Trunk fat percentage <sup>b</sup>                           | 346  | 2.40E-04 | 0.016 | 0.138                | <b>2.59E-02</b>   | 0.768                 | <b>1.61E-05</b> |
| Number of cigarettes previously smoked daily <sup>a,b</sup> | 13   | 3.40E-04 | 0.049 | 0.143                | <b>2.57E-03</b>   | 0.884                 | 0.497           |
| Lamb/mutton intake <sup>b</sup>                             | 16   | 4.20E-05 | 0.004 | 0.160                | <b>3.15E-03</b>   | 0.466                 | 0.294           |
| Father still alive <sup>a</sup>                             | 5    | 1.11E-05 | 0.003 | 0.170                | <b>1.24E-04</b>   | 0.323                 | 0.415           |
| Inflammatory polyarthropathies <sup>b</sup>                 | 8    | 1.73E-04 | 0.014 | 0.319                | <b>2.36E-02</b>   | 0.827                 | 0.487           |
| Connective tissue disorder <sup>a,b</sup>                   | 6    | 2.72E-05 | 0.005 | 0.118                | <b>5.19E-04</b>   | 0.435                 | 0.383           |
| Intestinal malabsorption <sup>b</sup>                       | 13   | 3.30E-05 | 0.004 | <b>0.018</b>         | <b>2.49E-02</b>   | 0.738                 | 0.279           |
| Malabsorption/coeliac disease <sup>b</sup>                  | 17   | 2.13E-05 | 0.004 | <b>0.001</b>         | <b>2.61E-05</b>   | 0.185                 | <b>0.049</b>    |

Thirteen exposures presented IVW  $P_{FDR}<0.05$  for mean diffusivity (MD). Exposures with odds ratios greater than 1 were considered as risk exposures, while exposures with odds ratios less than 1 were considered as protective exposures. <sup>a</sup>Data derived from analyses with instruments of  $p<1e-6$ ; <sup>b</sup>Data derived from analyses with instruments of  $p<5e-8$ ; <sup>a,b</sup>Data derived from analyses with instruments of  $p<1e-6$ , but this exposure showed  $P_{FDR}<0.05$  with both sets of instruments.

Abbreviations: MD, mean diffusivity; SNP, single nucleotide polymorphism; IVW, Inverse Variance Weighted; FDR, false discovery rate; Q test, Cochran's Q test.

## Supplement 6 Reverse causation analysis for significant modifiable exposures.

| Exposure: ICH or SVS                                 | SNPs | IVW OR<br>(95% CI) | IVW P        |
|------------------------------------------------------|------|--------------------|--------------|
| Time spent watching television                       | 3    | 0.99(0.96-1.03)    | 0.645        |
| None of qualifications                               | 3    | 1.00(0.99-1.01)    | 0.840        |
| Frequency of tiredness / lethargy in last 2 weeks    | 8    | 1.00(0.99-1.02)    | 0.904        |
| Days /week of moderate physical activity >10 minutes | 3    | 1.10(1.04 -1.16)   | <b>0.001</b> |
| Variation in diet                                    | 8    | 0.98(0.96-1.00)    | <b>0.016</b> |
| Usual walking pace                                   | 3    | 1.04(1.01-1.07)    | <b>0.009</b> |
| A /AS levels qualifications                          | 3    | 1.01(0.99-1.02)    | 0.487        |
| College or University degree                         | 3    | 1.00(0.99-1.01)    | 0.763        |
| Forced vital capacity (FVC)                          | 3    | 1.03(0.99-1.06)    | 0.108        |
| Forced expiratory volume in 1-second (FEV1)          | 3    | 1.03(0.99-1.06)    | 0.138        |
| Peak expiratory flow (PEF)                           | 3    | 1.01(0.97-1.05)    | 0.777        |
| <b>Exposure: Non-lobar hemorrhage or SVS</b>         |      |                    |              |
| Time spent watching television                       | 11   | 1.00(0.97-1.02)    | 0.825        |
| None of qualifications                               | 11   | 1.00(0.99-1.01)    | 0.925        |
| Days /week of moderate physical activity >10 minutes | 11   | 1.03(0.97-1.10)    | 0.340        |
| Usual walking pace                                   | 11   | 1.01(0.99-1.03)    | 0.159        |
| A /AS levels qualifications                          | 11   | 1.00(0.98-1.01)    | 0.470        |
| College or University degree                         | 11   | 1.00(1.00-1.01)    | 0.325        |
| Forced vital capacity (FVC)                          | 11   | 1.03(1.00-1.05)    | 0.065        |
| Forced expiratory volume in 1-second (FEV1)          | 11   | 1.03(1.00-1.05)    | <b>0.045</b> |
| Peak expiratory flow (PEF)                           | 11   | 1.01(0.98-1.03)    | 0.703        |

In reverse causation analysis, each of the listed modifiable factors was individually used as an outcome trait, with the trait “all location ICH or SVS” or “non-lobar hemorrhage or SVS” being the exposure trait. The analysis was performed with instruments of  $p < 1e-6$ . The trait “lobar hemorrhage or SVS” was not analyzable as no instrumental SNPs of  $p < 1e-6$  were present for any of those outcome traits. Abbreviations: ICH, intracerebral hemorrhage; SVS, small vessel stroke; SNP, single nucleotide polymorphism.
